# Supplementary material for: MicroRNAomic Analysis of Spent Media From Slow and Fast-Growing Bovine Embryos Reveal Distinct Differences
Source: Preprints.org preprint supplement (doi:10.20944/preprints202405.0596.v1), 2024-05-13
Supplement: Supplementary file 1 [file Animals Supplementary Material.docx]

**Supplementary Material**

**Table S1. Predicted mRNA targets of miRNAs differentially expressed between 2-cell SG**

| **miRNA** | **Gene** | **Cumulative Context Score** | **miRNA** | **Gene** | **Cumulative Context Score** |
| --- | --- | --- | --- | --- | --- |
| | bta-miR-1343-5p | | --- | | bta-miR-1343-5p | | bta-miR-1343-5p | | bta-miR-1343-5p | | bta-miR-1343-5p | | bta-miR-1343-5p | | bta-miR-1343-5p | | bta-miR-1343-5p | | bta-miR-1343-5p | | bta-miR-1343-5p | | bta-miR-1343-5p | | bta-miR-1343-5p | | bta-miR-1343-5p | | bta-miR-1343-5p | | bta-miR-1343-5p | | bta-miR-1343-5p | | bta-miR-1343-5p | | bta-miR-1343-5p | | bta-miR-1343-5p | | bta-miR-1343-5p | | bta-miR-1343-5p | | bta-miR-1343-5p | | bta-miR-1343-5p | | bta-miR-1343-5p | | bta-miR-1343-5p | | bta-miR-1343-5p | | bta-miR-1343-5p | | bta-miR-1343-5p | | bta-miR-1343-5p | | bta-miR-1343-5p | | bta-miR-1343-5p | | bta-miR-1343-5p | | bta-miR-1343-5p | | bta-miR-1343-5p | | bta-miR-1343-5p | | bta-miR-1343-5p | | bta-miR-1343-5p | | bta-miR-1343-5p | | bta-miR-1343-5p | | bta-miR-1343-5p | | bta-miR-1343-5p | | bta-miR-1343-5p | | bta-miR-1343-5p | | bta-miR-1343-5p | | bta-miR-1343-5p | | bta-miR-1343-5p | | bta-miR-1343-5p | | bta-miR-1343-5p | | bta-miR-1343-5p | | bta-miR-1343-5p | | bta-miR-1343-5p | | bta-miR-1343-5p | | bta-miR-1343-5p | | bta-miR-1343-5p | | bta-miR-1343-5p | | bta-miR-1343-5p | | bta-miR-1343-5p | | bta-miR-1343-5p | | bta-miR-1343-5p | | bta-miR-1343-5p | | bta-miR-1343-5p | | bta-miR-1343-5p | | bta-miR-1343-5p | | bta-miR-1343-5p | | bta-miR-1343-5p | | bta-miR-1343-5p | | bta-miR-1343-5p | | bta-miR-1343-5p | | bta-miR-1343-5p | | bta-miR-1343-5p | | bta-miR-1343-5p | | bta-miR-1343-5p | | bta-miR-1343-5p | | bta-miR-1343-5p | | bta-miR-1343-5p | | bta-miR-1343-5p | | bta-miR-1343-5p | | bta-miR-1343-5p | | bta-miR-1343-5p | | bta-miR-1343-5p | | bta-miR-1343-5p | | bta-miR-1343-5p | | bta-miR-1343-5p | | bta-miR-1343-5p | | bta-miR-1343-5p | | bta-miR-1343-5p | | bta-miR-1343-5p | | bta-miR-1343-5p | | bta-miR-1343-5p | | bta-miR-1343-5p | | bta-miR-1343-5p | | bta-miR-1343-5p | | bta-miR-1343-5p | | bta-miR-1343-5p | | bta-miR-1343-5p | | bta-miR-1343-5p | | bta-miR-1343-5p | | bta-miR-1343-5p | | bta-miR-1343-5p | | bta-miR-1343-5p | | bta-miR-1343-5p | | bta-miR-1343-5p | | bta-miR-1343-5p | | bta-miR-1343-5p | | bta-miR-1343-5p | | bta-miR-1343-5p | | bta-miR-1343-5p | | bta-miR-1343-5p | | bta-miR-1343-5p | | bta-miR-1343-5p | | bta-miR-1343-5p | | bta-miR-1343-5p | | bta-miR-1343-5p | | bta-miR-1343-5p | | bta-miR-1343-5p | | bta-miR-1343-5p | | bta-miR-1343-5p | | bta-miR-1343-5p | | bta-miR-1343-5p | | bta-miR-1343-5p | | bta-miR-1343-5p | | bta-miR-1343-5p | | bta-miR-1343-5p | | bta-miR-1343-5p | | bta-miR-1343-5p | | bta-miR-1343-5p | | bta-miR-1343-5p | | bta-miR-1343-5p | | bta-miR-1343-5p | | bta-miR-1343-5p | | bta-miR-1343-5p | | bta-miR-1343-5p | | bta-miR-1343-5p | | bta-miR-1343-5p | | bta-miR-1343-5p | | bta-miR-1343-5p | | bta-miR-1343-5p | | bta-miR-1343-5p | | bta-miR-1343-5p | | bta-miR-1343-5p | | bta-miR-1343-5p | | bta-miR-1343-5p | | bta-miR-1343-5p | | bta-miR-1343-5p | | bta-miR-1343-5p | | bta-miR-1343-5p | | bta-miR-1343-5p | | bta-miR-1343-5p | | bta-miR-1343-5p | | bta-miR-1343-5p | | bta-miR-1343-5p | | bta-miR-1343-5p | | bta-miR-1343-5p | | bta-miR-1343-5p | | bta-miR-1343-5p | | bta-miR-1343-5p | | bta-miR-1343-5p | | bta-miR-1343-5p | | bta-miR-1343-5p | | bta-miR-1343-5p | | bta-miR-1343-5p | | bta-miR-1343-5p | | bta-miR-1343-5p | | bta-miR-1343-5p | | bta-miR-1343-5p | | bta-miR-1343-5p | | bta-miR-1343-5p | | bta-miR-1343-5p | | bta-miR-1343-5p | | bta-miR-1343-5p | | bta-miR-1343-5p | | bta-miR-1343-5p | | bta-miR-1343-5p | | bta-miR-1343-5p | | bta-miR-1343-5p | | bta-miR-1343-5p | | bta-miR-1343-5p | | bta-miR-1343-5p | | bta-miR-1343-5p | | bta-miR-1343-5p | | bta-miR-1343-5p | | bta-miR-1343-5p | | bta-miR-1343-5p | | bta-miR-1343-5p | | bta-miR-1343-5p | | bta-miR-1343-5p | | bta-miR-1343-5p | | bta-miR-1343-5p | | bta-miR-1343-5p | | bta-miR-1343-5p | | bta-miR-1343-5p | | bta-miR-1343-5p | | bta-miR-1343-5p | | bta-miR-1343-5p | | bta-miR-1343-5p | | bta-miR-1343-5p | | bta-miR-1343-5p | | bta-miR-1343-5p | | bta-miR-1343-5p | | bta-miR-1343-5p | | bta-miR-1343-5p | | bta-miR-1343-5p | | bta-miR-1343-5p | | bta-miR-1343-5p | | bta-miR-1343-5p | | bta-miR-1343-5p | | bta-miR-1343-5p | | bta-miR-1343-5p | | bta-miR-1343-5p | | bta-miR-1343-5p | | bta-miR-1343-5p | | bta-miR-1343-5p | | bta-miR-1343-5p | | bta-miR-1343-5p | | bta-miR-1343-5p | | bta-miR-1343-5p | | bta-miR-1343-5p | | bta-miR-1343-5p | | bta-miR-1343-5p | | bta-miR-1343-5p | | bta-miR-1343-5p | | bta-miR-1343-5p | | bta-miR-1343-5p | | bta-miR-1343-5p | | bta-miR-1343-5p | | bta-miR-1343-5p | | bta-miR-1343-5p | | bta-miR-1343-5p | | bta-miR-1343-5p | | bta-miR-1343-5p | | bta-miR-1343-5p | | bta-miR-1343-5p | | bta-miR-1343-5p | | bta-miR-1343-5p | | bta-miR-1343-5p | | bta-miR-1343-5p | | bta-miR-1343-5p | | bta-miR-1343-5p | | bta-miR-1343-5p | | bta-miR-1343-5p | | bta-miR-1343-5p | | bta-miR-1343-5p | | bta-miR-1343-5p | | bta-miR-1343-5p | | bta-miR-1343-5p | | bta-miR-1343-5p | | bta-miR-1343-5p | | bta-miR-1343-5p | | bta-miR-1343-5p | | bta-miR-1343-5p | | bta-miR-1343-5p | | bta-miR-1343-5p | | bta-miR-1343-5p | | bta-miR-1343-5p | | bta-miR-1343-5p | | bta-miR-1343-5p | | bta-miR-1343-5p | | bta-miR-1343-5p | | bta-miR-1343-5p | | bta-miR-1343-5p | | bta-miR-1343-5p | | bta-miR-1343-5p | | bta-miR-1343-5p | | bta-miR-1343-5p | | bta-miR-1343-5p | | bta-miR-1343-5p | | bta-miR-1343-5p | | bta-miR-1343-5p | | bta-miR-1343-5p | | bta-miR-1343-5p | | bta-miR-1343-5p | | bta-miR-1343-5p | | bta-miR-1343-5p | | bta-miR-1343-5p | | bta-miR-1343-5p | | bta-miR-1343-5p | | bta-miR-1343-5p | | bta-miR-2325a | | bta-miR-2325a | | bta-miR-2325a | | bta-miR-2325a | | bta-miR-2325a | | bta-miR-2325c | | bta-miR-2325c | | bta-miR-2325c | | bta-miR-2325c | | bta-miR-2325c | | bta-miR-2325c | | bta-miR-2325c | | bta-miR-2325c | | bta-miR-2325c | | bta-miR-2325c | | bta-miR-2325c | | bta-miR-2325c | | bta-miR-2325c | | bta-miR-2325c | | bta-miR-2325c | | bta-miR-2325c | | bta-miR-2325c | | bta-miR-2325c | | bta-miR-2325c | | bta-miR-2325c | | bta-miR-2325c | | bta-miR-2325c | | bta-miR-2325c | | bta-miR-2325c | | bta-miR-2325c | | bta-miR-2325c | | bta-miR-2325c | | bta-miR-2325c | | bta-miR-2325c | | bta-miR-2359 | | bta-miR-2359 | | bta-miR-2359 | | bta-miR-2359 | | bta-miR-2359 | | bta-miR-2359 | | bta-miR-2359 | | bta-miR-2359 | | bta-miR-2359 | | bta-miR-2359 | | bta-miR-2359 | | bta-miR-2359 | | bta-miR-2359 | | bta-miR-2359 | | bta-miR-2359 | | bta-miR-2359 | | bta-miR-2393 | | bta-miR-2393 | | | PRX | | --- | | KIAA0513 | | KSR2 | | RAB37 | | LY6G6C | | EHD2 | | C17orf103 | | GAS8 | | RGMA | | OSM | | LYPD1 | | PKD1 | | MS4A15 | | GPA33 | | COTL1 | | FKBP1A | | HOXB5 | | SPSB1 | | TFCP2L1 | | TFEB | | FHL3 | | SIPA1L3 | | LDLRAP1 | | KCTD17 | | SIX5 | | KB-1507C5.2 | | MVB12B | | ATG9A | | HMGA1 | | TBC1D13 | | GRB7 | | KLK14 | | UBE2QL1 | | THTPA | | PIRT | | TNS4 | | HEPACAM | | STIM1 | | RRP1 | | PACRG | | PSORS1C1 | | GAREML | | NUPR1 | | SERPINE3 | | AQP5 | | TSTA3 | | GLIS1 | | SEC14L6 | | LY6E | | CAMKV | | TMEM150A | | TMCC2 | | SCAND1 | | LOH12CR1 | | IL17REL | | TMEM27 | | PRRT2 | | ABHD14B | | RNASEH2A | | JPH4 | | NDRG4 | | RARG | | LIF | | CABP7 | | RIMS4 | | AIF1L | | PTMS | | CASQ1 | | SERPINB6 | | GJB4 | | KIAA1644 | | FAM178B | | GPIHBP1 | | BLOC1S3 | | FAM222B | | SLC6A8 | | USP21 | | ZNF703 | | VAMP2 | | ASTN1 | | FCRL6 | | APLNR | | DDX41 | | FAM163A | | WNK2 | | GPRC5A | | CDR2L | | RP11-195F19.5 | | SNX17 | | S100A2 | | CERS3 | | PXN | | CTB-96E2.2 | | C19orf35 | | TAGLN | | KIF17 | | HOXA6 | | CSMD2 | | UQCC1 | | C17orf80 | | PAX8 | | NUDC | | NACC1 | | AC145676.2 | | CNNM4 | | LMAN2L | | PLOD3 | | CALCOCO1 | | AC024940.1 | | CD300LB | | EFHD2 | | CBX2 | | KIF21B | | KIAA0247 | | KDM6B | | CYP46A1 | | PPP2R4 | | FOXI2 | | CRY2 | | STX6 | | PITX1 | | LINC00632 | | RNF222 | | PPARGC1B | | PCYT1B | | KIRREL | | EPB41 | | MEA1 | | VSTM5 | | SERINC2 | | NFAM1 | | TNS1 | | PYGM | | TATDN3 | | CLEC3A | | CTC-360G5.1 | | SHISA9 | | ERGIC1 | | SLC7A5 | | SNCG | | ALX4 | | AGAP2-AS1 | | TNFSF12 | | RHOB | | PPIE | | KRTAP10-1 | | CHST1 | | PVRIG | | KCNMB1 | | MTAP | | PPP2R5D | | PRRG3 | | KCNC3 | | UCP2 | | TAL1 | | AP001652.1 | | NUP98 | | GATS | | AC006946.15 | | TMEM79 | | SNX12 | | CELSR2 | | KRT17 | | NHP2 | | DUSP28 | | RBMXL2 | | PTK2B | | PGS1 | | CSNK2B-LY6G5B-1181 | | GABARAPL1 | | SYNGR1 | | OBP2B | | LOXL1 | | HDAC10 | | EMC10 | | CEACAM1 | | CD7 | | MPP2 | | ELOVL1 | | LZTS2 | | NYAP1 | | DCHS1 | | HRH3 | | CLTCL1 | | NIPSNAP1 | | GSC | | COL5A3 | | ADCYAP1R1 | | NOTUM | | RPP30 | | POLR2J2 | | PNMA6A | | TNNT2 | | ONECUT3 | | POLE3 | | ATXN2L | | C10orf105 | | TBC1D22B | | PRSS42 | | DKFZP434O1614 | | FAM101A | | PPP1R32 | | STC1 | | CYB5R3 | | CCDC142 | | C6orf223 | | ATP6V0D1 | | C2orf62 | | PPP5C | | IRGQ | | CCL22 | | ZDHHC7 | | TRIM3 | | WDTC1 | | COLQ | | JUP | | LEPREL4 | | NTN3 | | DCAKD | | C1orf134 | | ELOVL2 | | PRKCG | | FOXM1 | | RPH3A | | TMEM151B | | R3HCC1 | | VPS53 | | CCDC149 | | LDLRAD2 | | GABBR2 | | RHBDF2 | | CX3CL1 | | LBH | | ICAM1 | | ABHD17A | | TBC1D16 | | GDF11 | | CNOT3 | | GINS2 | | ANGPTL6 | | FBXO31 | | TUBB4A | | ZBTB46 | | SH3TC2 | | ATP5D | | RAX | | RNF165 | | MMP24 | | SELRC1 | | LPCAT3 | | VAT1 | | USP46 | | SZT2 | | CTRL | | SLC16A2 | | C11orf42 | | TOM1L2 | | PLEKHG4 | | KRTAP10-9 | | THY1 | | PRR11 | | GRINA | | GIPR | | TEX35 | | GAS2L2 | | TRPM4 | | TMEM222 | | C9orf171 | | BAHD1 | | TPRG1L | | UROC1 | | PROSC | | RCN3 | | DPF1 | | SH2B1 | | RASD2 | | RALB | | LRRC4C | | SYNE2 | | PTMA | | SCAF4 | | FAM155A | | TTN | | SMAD4 | | C7orf66 | | RSPO3 | | NECAB1 | | BOD1L2 | | RP11-595B24.2 | | ELAVL4 | | CACNG2 | | U2AF1 | | PTMA | | NRXN3 | | AGBL3 | | MTMR8 | | MUC19 | | ZNF30 | | CTD-2054N24.2 | | FAM27E1 | | FAM27E3 | | OR5H14 | | FAM27E2 | | SMIM11 | | ZG16 | | EMC4 | | FAM185A | | CTB-186H2.3 | | PLN | | RPN1 | | DKFZP779J2370 | | RP4-758J18.2 | | SOX6 | | CDC123 | | SPINK13 | | S100A7 | | CCT6B | | S100A7L2 | | COX6A2 | | MRPS18B | | ELANE | | OSTN | | RP11-67H2.1 | | TMEFF2 | | LAMTOR3 | | SERPINB5 | | DCAF4L2 | | NBPF16 | | C12orf36 | | | -1.51 | | --- | | -1.48 | | -1.29 | | -1.27 | | -1.24 | | -1.22 | | -1.13 | | -1.1 | | -1.03 | | -1 | | -0.95 | | -0.95 | | -0.95 | | -0.95 | | -0.92 | | -0.91 | | -0.91 | | -0.86 | | -0.86 | | -0.86 | | -0.86 | | -0.85 | | -0.84 | | -0.83 | | -0.83 | | -0.82 | | -0.82 | | -0.8 | | -0.8 | | -0.79 | | -0.79 | | -0.78 | | -0.78 | | -0.77 | | -0.77 | | -0.77 | | -0.77 | | -0.77 | | -0.76 | | -0.76 | | -0.76 | | -0.76 | | -0.75 | | -0.75 | | -0.75 | | -0.75 | | -0.75 | | -0.74 | | -0.74 | | -0.74 | | -0.73 | | -0.73 | | -0.73 | | -0.72 | | -0.72 | | -0.71 | | -0.71 | | -0.71 | | -0.71 | | -0.71 | | -0.71 | | -0.7 | | -0.7 | | -0.7 | | -0.7 | | -0.7 | | -0.7 | | -0.7 | | -0.7 | | -0.7 | | -0.7 | | -0.69 | | -0.69 | | -0.68 | | -0.68 | | -0.68 | | -0.68 | | -0.68 | | -0.67 | | -0.67 | | -0.67 | | -0.67 | | -0.67 | | -0.67 | | -0.67 | | -0.66 | | -0.66 | | -0.66 | | -0.66 | | -0.66 | | -0.66 | | -0.65 | | -0.65 | | -0.65 | | -0.65 | | -0.65 | | -0.65 | | -0.65 | | -0.65 | | -0.64 | | -0.64 | | -0.64 | | -0.64 | | -0.64 | | -0.64 | | -0.64 | | -0.64 | | -0.64 | | -0.64 | | -0.64 | | -0.64 | | -0.64 | | -0.64 | | -0.63 | | -0.63 | | -0.63 | | -0.63 | | -0.63 | | -0.62 | | -0.62 | | -0.62 | | -0.62 | | -0.62 | | -0.62 | | -0.62 | | -0.62 | | -0.62 | | -0.62 | | -0.61 | | -0.61 | | -0.61 | | -0.61 | | -0.61 | | -0.61 | | -0.6 | | -0.6 | | -0.6 | | -0.6 | | -0.6 | | -0.6 | | -0.6 | | -0.59 | | -0.59 | | -0.59 | | -0.59 | | -0.59 | | -0.59 | | -0.59 | | -0.59 | | -0.59 | | -0.59 | | -0.59 | | -0.59 | | -0.58 | | -0.58 | | -0.58 | | -0.58 | | -0.58 | | -0.58 | | -0.58 | | -0.58 | | -0.57 | | -0.57 | | -0.57 | | -0.57 | | -0.57 | | -0.57 | | -0.57 | | -0.57 | | -0.57 | | -0.57 | | -0.57 | | -0.56 | | -0.56 | | -0.56 | | -0.56 | | -0.56 | | -0.56 | | -0.56 | | -0.56 | | -0.56 | | -0.56 | | -0.56 | | -0.56 | | -0.55 | | -0.55 | | -0.55 | | -0.55 | | -0.55 | | -0.55 | | -0.55 | | -0.55 | | -0.55 | | -0.55 | | -0.55 | | -0.55 | | -0.55 | | -0.55 | | -0.55 | | -0.55 | | -0.55 | | -0.55 | | -0.55 | | -0.54 | | -0.54 | | -0.54 | | -0.54 | | -0.54 | | -0.54 | | -0.54 | | -0.54 | | -0.54 | | -0.54 | | -0.54 | | -0.54 | | -0.54 | | -0.54 | | -0.54 | | -0.54 | | -0.53 | | -0.53 | | -0.53 | | -0.53 | | -0.53 | | -0.53 | | -0.53 | | -0.53 | | -0.53 | | -0.53 | | -0.53 | | -0.53 | | -0.52 | | -0.52 | | -0.52 | | -0.52 | | -0.52 | | -0.52 | | -0.52 | | -0.52 | | -0.52 | | -0.52 | | -0.51 | | -0.51 | | -0.51 | | -0.51 | | -0.51 | | -0.51 | | -0.51 | | -0.51 | | -0.51 | | -0.51 | | -0.51 | | -0.51 | | -0.51 | | -0.51 | | -0.51 | | -0.5 | | -0.5 | | -0.5 | | -0.5 | | -0.5 | | -0.5 | | -0.5 | | -0.5 | | -0.5 | | -0.5 | | -0.5 | | -0.5 | | -0.5 | | -0.5 | | -0.5 | | -0.5 | | -0.5 | | -0.5 | | -0.5 | | -0.5 | | -0.5 | | -0.88 | | -0.56 | | -0.56 | | -0.52 | | -0.5 | | -1.52 | | -1 | | -0.89 | | -0.88 | | -0.87 | | -0.87 | | -0.85 | | -0.84 | | -0.73 | | -0.69 | | -0.68 | | -0.66 | | -0.64 | | -0.59 | | -0.58 | | -0.58 | | -0.57 | | -0.57 | | -0.57 | | -0.56 | | -0.55 | | -0.55 | | -0.54 | | -0.53 | | -0.51 | | -0.51 | | -0.51 | | -0.51 | | -0.5 | | -1.17 | | -1 | | -0.72 | | -0.71 | | -0.67 | | -0.64 | | -0.62 | | -0.61 | | -0.58 | | -0.56 | | -0.56 | | -0.54 | | -0.53 | | -0.52 | | -0.51 | | -0.5 | | -1.05 | | -1.04 | | | bta-miR-2393 | | --- | | bta-miR-2393 | | bta-miR-2393 | | bta-miR-2393 | | bta-miR-2393 | | bta-miR-2393 | | bta-miR-2393 | | bta-miR-2393 | | bta-miR-2393 | | bta-miR-2393 | | bta-miR-2393 | | bta-miR-2393 | | bta-miR-2393 | | bta-miR-2393 | | bta-miR-2393 | | bta-miR-2393 | | bta-miR-2393 | | bta-miR-2393 | | bta-miR-2393 | | bta-miR-2393 | | bta-miR-2393 | | bta-miR-2393 | | bta-miR-2393 | | bta-miR-2393 | | bta-miR-2412 | | bta-miR-2412 | | bta-miR-2412 | | bta-miR-2412 | | bta-miR-2412 | | bta-miR-2412 | | bta-miR-2412 | | bta-miR-2412 | | bta-miR-2412 | | bta-miR-2412 | | bta-miR-2412 | | bta-miR-2412 | | bta-miR-2412 | | bta-miR-2412 | | bta-miR-2412 | | bta-miR-2412 | | bta-miR-2412 | | bta-miR-2412 | | bta-miR-2412 | | bta-miR-2412 | | bta-miR-2412 | | bta-miR-2412 | | bta-miR-2412 | | bta-miR-2412 | | bta-miR-2412 | | bta-miR-2412 | | bta-miR-2412 | | bta-miR-2412 | | bta-miR-2412 | | bta-miR-2412 | | bta-miR-2412 | | bta-miR-2412 | | bta-miR-2412 | | bta-miR-2412 | | bta-miR-2421 | | bta-miR-2421 | | bta-miR-2421 | | bta-miR-2421 | | bta-miR-2421 | | bta-miR-2421 | | bta-miR-2421 | | bta-miR-2421 | | bta-miR-2421 | | bta-miR-2421 | | bta-miR-2421 | | bta-miR-2421 | | bta-miR-2421 | | bta-miR-2421 | | bta-miR-2421 | | bta-miR-2421 | | bta-miR-2421 | | bta-miR-2421 | | bta-miR-2421 | | bta-miR-2421 | | bta-miR-2421 | | bta-miR-2421 | | bta-miR-2421 | | bta-miR-2421 | | bta-miR-2421 | | bta-miR-2421 | | bta-miR-2421 | | bta-miR-2421 | | bta-miR-2434 | | bta-miR-2434 | | bta-miR-2434 | | bta-miR-2434 | | bta-miR-2434 | | bta-miR-2434 | | bta-miR-2434 | | bta-miR-2434 | | bta-miR-2434 | | bta-miR-2434 | | bta-miR-2434 | | bta-miR-2434 | | bta-miR-2434 | | bta-miR-2434 | | bta-miR-2434 | | bta-miR-2434 | | bta-miR-2434 | | bta-miR-2434 | | bta-miR-2434 | | bta-miR-2434 | | bta-miR-2434 | | bta-miR-2434 | | bta-miR-2434 | | bta-miR-2434 | | bta-miR-2434 | | bta-miR-2434 | | bta-miR-2434 | | bta-miR-2434 | | bta-miR-2434 | | bta-miR-2434 | | bta-miR-2434 | | bta-miR-2434 | | bta-miR-2434 | | bta-miR-2434 | | bta-miR-2434 | | bta-miR-2434 | | bta-miR-2434 | | bta-miR-2434 | | bta-miR-2434 | | bta-miR-2434 | | bta-miR-2434 | | bta-miR-2434 | | bta-miR-2434 | | bta-miR-2434 | | bta-miR-2434 | | bta-miR-2434 | | bta-miR-2434 | | bta-miR-2434 | | bta-miR-2444 | | bta-miR-2444 | | bta-miR-2444 | | bta-miR-2444 | | bta-miR-2444 | | bta-miR-2444 | | bta-miR-2444 | | bta-miR-2444 | | bta-miR-2444 | | bta-miR-2444 | | bta-miR-2444 | | bta-miR-2444 | | bta-miR-2444 | | bta-miR-2444 | | bta-miR-2444 | | bta-miR-2444 | | bta-miR-2444 | | bta-miR-2444 | | bta-miR-2444 | | bta-miR-2444 | | bta-miR-2444 | | bta-miR-2444 | | bta-miR-2444 | | bta-miR-2444 | | bta-miR-2444 | | bta-miR-2444 | | bta-miR-2444 | | bta-miR-2444 | | bta-miR-2444 | | bta-miR-2444 | | bta-miR-2444 | | bta-miR-2444 | | bta-miR-2444 | | bta-miR-2444 | | bta-miR-2444 | | bta-miR-2444 | | bta-miR-2444 | | bta-miR-2444 | | bta-miR-2444 | | bta-miR-2444 | | bta-miR-2444 | | bta-miR-2444 | | bta-miR-2444 | | bta-miR-2444 | | bta-miR-2444 | | bta-miR-2444 | | bta-miR-2452 | | bta-miR-2452 | | bta-miR-2452 | | bta-miR-2452 | | bta-miR-2452 | | bta-miR-2452 | | bta-miR-2452 | | bta-miR-2452 | | bta-miR-2452 | | bta-miR-2452 | | bta-miR-2452 | | bta-miR-2452 | | bta-miR-2452 | | bta-miR-2452 | | bta-miR-2452 | | bta-miR-2452 | | bta-miR-2452 | | bta-miR-2452 | | bta-miR-2452 | | bta-miR-2452 | | bta-miR-2452 | | bta-miR-2452 | | bta-miR-2452 | | bta-miR-2452 | | bta-miR-2452 | | bta-miR-2452 | | bta-miR-2452 | | bta-miR-2452 | | bta-miR-2452 | | bta-miR-2452 | | bta-miR-2452 | | bta-miR-3613a | | bta-miR-3613a | | bta-miR-3613a | | bta-miR-3613a | | bta-miR-3613a | | bta-miR-3613a | | bta-miR-3613a | | bta-miR-3613a | | bta-miR-3613a | | bta-miR-3613a | | bta-miR-3613a | | bta-miR-3613a | | bta-miR-3613a | | bta-miR-3613a | | bta-miR-3613a | | bta-miR-3613a | | bta-miR-3613a | | bta-miR-3613a | | bta-miR-3613a | | bta-miR-3613a | | bta-miR-3613a | | bta-miR-3613a | | bta-miR-3613a | | bta-miR-3613a | | bta-miR-3613b | | bta-miR-3613b | | bta-miR-3613b | | bta-miR-3613b | | bta-miR-3613b | | bta-miR-3613b | | bta-miR-3613b | | bta-miR-3613b | | bta-miR-3613b | | bta-miR-3613b | | bta-miR-3613b | | bta-miR-3613b | | bta-miR-3613b | | bta-miR-3613b | | bta-miR-3613b | | bta-miR-3613b | | bta-miR-3613b | | bta-miR-3613b | | bta-miR-3613b | | bta-miR-3613b | | bta-miR-3613b | | bta-miR-3613b | | bta-miR-3613b | | bta-miR-3613b | | bta-miR-3613b | | bta-miR-3613b | | bta-miR-3613b | | bta-miR-3613b | | bta-miR-3613b | | bta-miR-3613b | | bta-miR-3613b | | bta-miR-3613b | | bta-miR-455-3p | | bta-miR-455-3p | | bta-miR-455-3p | | bta-miR-455-3p | | bta-miR-455-3p | | bta-miR-455-3p | | bta-miR-455-3p | | bta-miR-455-3p | | bta-miR-455-3p | | bta-miR-628 | | bta-miR-628 | | bta-miR-628 | | bta-miR-628 | | bta-miR-628 | | bta-miR-628 | | bta-miR-628 | | bta-miR-628 | | bta-miR-628 | | bta-miR-628 | | bta-miR-628 | | bta-miR-628 | | bta-miR-628 | | bta-miR-628 | | bta-miR-628 | | bta-miR-628 | | bta-miR-628 | | bta-miR-628 | | bta-miR-628 | | bta-miR-628 | | bta-miR-628 | | bta-miR-628 | | bta-miR-628 | | bta-miR-628 | | bta-miR-628 | | bta-miR-628 | | bta-miR-628 | | bta-miR-628 | | bta-miR-628 | | bta-miR-628 | | bta-miR-628 | | bta-miR-628 | | bta-miR-628 | | bta-miR-628 | | bta-miR-628 | | bta-miR-628 | | bta-miR-628 | | bta-miR-628 | | bta-miR-628 | | bta-miR-628 | | bta-miR-628 | | bta-miR-628 | | bta-miR-628 | | bta-miR-628 | | bta-miR-628 | | bta-miR-628 | | bta-miR-628 | | bta-miR-628 | | bta-miR-628 | | bta-miR-628 | | bta-miR-628 | | bta-miR-628 | | bta-miR-628 | | bta-miR-628 | | | SRGAP3 | | --- | | CLMP | | MECP2 | | NKX2-1 | | KLF12 | | NKD1 | | ETV6 | | RORA | | BRCA2 | | RP11-67H2.1 | | CYLC2 | | FAM171B | | C21orf37 | | TTC30B | | DNAJC1 | | OR51I2 | | GYPA | | SLC25A31 | | KRCC1 | | FAM213A | | AC090186.1 | | OR4F4 | | DYDC1 | | PMPCB | | PML | | COX6B2 | | TNFSF13 | | C15orf32 | | WNT4 | | CTD-3203P2.2 | | SNX32 | | TNFSF12-TNFSF13 | | SLC34A2 | | C1QTNF6 | | KXD1 | | CPLX3 | | RBPMS2 | | CRABP2 | | RFX1 | | SPATA3 | | FAM53B | | GRAP | | PSCA | | CMIP | | FAM98C | | PIP5K1C | | SEPT5 | | LZTS1 | | SUV39H1 | | FAM102A | | IL18RAP | | PRPH | | ENPP7 | | TARBP2 | | GBP5 | | AMZ1 | | GBGT1 | | ZNRF3 | | XKR4 | | NFIA | | ONECUT2 | | TCF4 | | ELAVL4 | | NFIB | | GABRB3 | | THRB | | POU6F2 | | TNRC6C | | IGIP | | TNRC6B | | GLIPR1L1 | | CYLC2 | | RUNX1T1 | | PRR26 | | ZFHX3 | | TSHZ2 | | NECAB1 | | ELAVL3 | | AL359878.1 | | LOH12CR2 | | RBMS1 | | PCLO | | ZRSR1 | | ZBTB7A | | CREBRF | | GRIN2B | | WDR38 | | MT-ATP8 | | KCNMB1 | | FSIP1 | | CYSLTR2 | | MEI4 | | UBTD2 | | SLC13A3 | | CRISP2 | | MT-ND4L | | IMPG1 | | PPIL1 | | NAMPT | | AC110619.2 | | SEC61B | | TFRC | | NRIP1 | | YIPF1 | | FOXM1 | | RAD51B | | SYNE3 | | ADRB2 | | C16orf92 | | HRK | | DDX42 | | TST | | EXD1 | | HOXB8 | | AL589765.1 | | ZNF770 | | TFAP2A | | DMRTC2 | | ZC3HAV1L | | FAM174A | | NMUR2 | | CTRC | | GABARAP | | HOXC8 | | RP11-247C2.2 | | ADGB | | DNAI2 | | TNK1 | | DPM2 | | PEX11G | | KRTAP19-2 | | P2RY13 | | TP63 | | SOSTDC1 | | RP4-758J18.2 | | RP11-67H2.1 | | GORASP1 | | RP11-105C20.2 | | OR6C65 | | RP11-169F17.1 | | AC090186.1 | | GLRA3 | | TFEC | | AMELY | | AMELX | | SMIM11 | | AICDA | | EI24 | | NRXN1 | | CMBL | | OR5H14 | | LCMT2 | | AJAP1 | | PLGRKT | | ELAVL3 | | DRD5 | | ZPBP | | NXPE4 | | DNMT3A | | RBFOX2 | | AAED1 | | CDC26 | | PTP4A2 | | CIR1 | | AC140061.12 | | SAMD12 | | TLE1 | | KB-1980E6.3 | | ELAVL4 | | GKAP1 | | PLCXD2 | | C1orf63 | | AC002451.1 | | C20orf85 | | SSMEM1 | | C2orf83 | | ANGPTL6 | | RP11-1102P16.1 | | HNRNPUL1 | | AC005477.1 | | AC004899.1 | | NTNG1 | | C15orf32 | | PDE7B | | LIMK2 | | ZNF23 | | SMCP | | GGACT | | TMPRSS11F | | SPP2 | | TBCE | | C2orf74 | | TMEM223 | | APOBEC2 | | SATL1 | | CRYBB1 | | TMED6 | | C17orf67 | | PPAP2B | | C2orf83 | | PSME4 | | CDC37 | | ZNF785 | | C2orf88 | | TAL2 | | VBP1 | | AL138847.1 | | PPP1R14B | | CHST9 | | AC015987.2 | | TBL1Y | | ZNF30 | | RNASE3 | | RNASE2 | | RP11-105C20.2 | | AKAP6 | | C9orf129 | | EXOSC1 | | GPX4 | | ZFYVE21 | | CTC-241N9.1 | | ANP32B | | C2orf73 | | KRT35 | | HIST2H4B | | AL162407.1 | | CASP5 | | LYRM2 | | ZNF667 | | IFRD2 | | AC007390.5 | | STK38 | | AL590452.1 | | GATA2 | | CYP2C9 | | GAPVD1 | | GAS7 | | USP42 | | CCDC132 | | TMBIM6 | | KDELR2 | | GOLT1B | | SIK2 | | UBR2 | | KPNA6 | | MFN2 | | HSD17B12 | | DEDD | | CDK12 | | IKZF4 | | LONRF2 | | RHOQ | | LGI2 | | FAM126A | | ZFP37 | | SNX30 | | GLE1 | | ZIC5 | | AGAP2 | | RBM25 | | ARHGAP35 | | MRRF | | USP38 | | CPD | | CEP128 | | CELF2 | | FGFBP2 | | SLC25A3 | | PSMA2 | | HOXC4 | | NDUFA2 | | CUL3 | | INIP | | TSPAN18 | | COLEC12 | | SSR1 | | LL22NC03-63E9.3 | | POC1B-GALNT4 | | PGBD4 | | BOD1L2 | | GALNT4 | | KATNAL2 | | ADH7 | | COL9A3 | | CHST9 | | TAS2R14 | | NBPF16 | | GALNT9 | | SPATA33 | | STEAP1B | | AC013269.5 | | AP3B2 | | ZNF277 | | FABP1 | | SNRPA1 | | EAF1 | | C8orf22 | | DALRD3 | | SDIM1 | | CST3 | | HRNR | | GOLT1B | | CCDC146 | | ZBTB37 | | ATG4A | | PDCD5 | | ZGLP1 | | SCRN3 | | CLMP | | TMEM57 | | SERPINA5 | | DMC1 | | FAN1 | | EXOSC10 | | NADK | | DCX | | TRAF5 | | TRIM9 | | TMEM200C | | DAOA | | CDC25C | | RNF34 | | ZFP41 | | CST9L | | FUNDC2 | | AC074091.13 | | DOK2 | | MORC4 | | NNT | | KRT31 | | | -1 | | --- | | -1 | | -1 | | -1 | | -1 | | -1 | | -1 | | -1 | | -0.85 | | -0.74 | | -0.69 | | -0.63 | | -0.61 | | -0.58 | | -0.55 | | -0.55 | | -0.54 | | -0.54 | | -0.54 | | -0.52 | | -0.51 | | -0.51 | | -0.5 | | -0.5 | | -1.17 | | -1.09 | | -1.04 | | -1.03 | | -0.97 | | -0.91 | | -0.85 | | -0.85 | | -0.81 | | -0.78 | | -0.75 | | -0.71 | | -0.68 | | -0.66 | | -0.65 | | -0.59 | | -0.59 | | -0.58 | | -0.58 | | -0.58 | | -0.57 | | -0.57 | | -0.56 | | -0.56 | | -0.56 | | -0.55 | | -0.54 | | -0.54 | | -0.53 | | -0.52 | | -0.52 | | -0.51 | | -0.51 | | -0.5 | | -2.17 | | -1.79 | | -1.5 | | -1.21 | | -1.14 | | -1.09 | | -1 | | -1 | | -0.99 | | -0.92 | | -0.91 | | -0.87 | | -0.82 | | -0.81 | | -0.75 | | -0.74 | | -0.71 | | -0.7 | | -0.7 | | -0.65 | | -0.6 | | -0.54 | | -0.54 | | -0.54 | | -0.53 | | -0.52 | | -0.51 | | -0.51 | | -0.94 | | -0.93 | | -0.8 | | -0.8 | | -0.76 | | -0.72 | | -0.72 | | -0.71 | | -0.7 | | -0.68 | | -0.68 | | -0.67 | | -0.64 | | -0.63 | | -0.62 | | -0.62 | | -0.6 | | -0.6 | | -0.59 | | -0.57 | | -0.57 | | -0.56 | | -0.56 | | -0.55 | | -0.55 | | -0.55 | | -0.55 | | -0.55 | | -0.55 | | -0.55 | | -0.54 | | -0.54 | | -0.54 | | -0.54 | | -0.54 | | -0.54 | | -0.53 | | -0.53 | | -0.53 | | -0.52 | | -0.52 | | -0.52 | | -0.52 | | -0.51 | | -0.5 | | -0.5 | | -0.5 | | -0.5 | | -1.05 | | -0.92 | | -0.91 | | -0.82 | | -0.79 | | -0.79 | | -0.69 | | -0.68 | | -0.66 | | -0.64 | | -0.63 | | -0.62 | | -0.62 | | -0.61 | | -0.61 | | -0.61 | | -0.6 | | -0.58 | | -0.58 | | -0.58 | | -0.57 | | -0.57 | | -0.57 | | -0.57 | | -0.57 | | -0.56 | | -0.56 | | -0.56 | | -0.54 | | -0.54 | | -0.54 | | -0.53 | | -0.53 | | -0.53 | | -0.53 | | -0.52 | | -0.52 | | -0.51 | | -0.51 | | -0.51 | | -0.51 | | -0.51 | | -0.51 | | -0.5 | | -0.5 | | -0.5 | | -1.73 | | -1.29 | | -1.17 | | -1 | | -1 | | -0.88 | | -0.83 | | -0.73 | | -0.7 | | -0.66 | | -0.66 | | -0.64 | | -0.64 | | -0.62 | | -0.62 | | -0.62 | | -0.59 | | -0.59 | | -0.56 | | -0.54 | | -0.54 | | -0.54 | | -0.54 | | -0.52 | | -0.52 | | -0.51 | | -0.5 | | -0.5 | | -0.5 | | -0.5 | | -0.5 | | -0.88 | | -0.88 | | -0.88 | | -0.81 | | -0.77 | | -0.76 | | -0.75 | | -0.66 | | -0.64 | | -0.59 | | -0.59 | | -0.57 | | -0.57 | | -0.56 | | -0.54 | | -0.53 | | -0.53 | | -0.52 | | -0.52 | | -0.52 | | -0.51 | | -0.51 | | -0.5 | | -0.5 | | -1 | | -1 | | -1 | | -1 | | -1 | | -1 | | -1 | | -1 | | -1 | | -1 | | -1 | | -1 | | -1 | | -1 | | -1 | | -1 | | -1 | | -1 | | -1 | | -1 | | -1 | | -1 | | -1 | | -1 | | -1 | | -1 | | -1 | | -1 | | -1 | | -1 | | -0.92 | | -0.54 | | -0.71 | | -0.63 | | -0.57 | | -0.56 | | -0.54 | | -0.53 | | -0.51 | | -0.5 | | -0.5 | | -1.19 | | -1.16 | | -1.11 | | -0.95 | | -0.82 | | -0.79 | | -0.78 | | -0.72 | | -0.72 | | -0.72 | | -0.7 | | -0.69 | | -0.69 | | -0.68 | | -0.67 | | -0.66 | | -0.65 | | -0.64 | | -0.63 | | -0.62 | | -0.61 | | -0.6 | | -0.6 | | -0.59 | | -0.58 | | -0.58 | | -0.58 | | -0.57 | | -0.57 | | -0.57 | | -0.56 | | -0.56 | | -0.56 | | -0.54 | | -0.54 | | -0.54 | | -0.53 | | -0.53 | | -0.53 | | -0.53 | | -0.53 | | -0.52 | | -0.52 | | -0.52 | | -0.52 | | -0.51 | | -0.51 | | -0.51 | | -0.51 | | -0.51 | | -0.51 | | -0.51 | | -0.5 | | -0.5 | |

**Table S2. Predicted mRNA targets of miRNAs differentially expressed between 8-cell SG SM vs. 8-Cell FG SM.**

| **miRNAs** | **Genes** | **Cumulative Context Score** | **miRNAs** | **Genes** | **Cumulative Context Score** |
| --- | --- | --- | --- | --- | --- |
| | bta-miR-1281 | | --- | | bta-miR-1281 | | bta-miR-1281 | | bta-miR-1281 | | bta-miR-1281 | | bta-miR-1281 | | bta-miR-1281 | | bta-miR-1281 | | bta-miR-1281 | | bta-miR-1281 | | bta-miR-1281 | | bta-miR-1281 | | bta-miR-1281 | | bta-miR-1281 | | bta-miR-1281 | | bta-miR-1281 | | bta-miR-1281 | | bta-miR-1281 | | bta-miR-1281 | | bta-miR-1281 | | bta-miR-1281 | | bta-miR-1281 | | bta-miR-1281 | | bta-miR-1281 | | bta-miR-1281 | | bta-miR-1281 | | bta-miR-1281 | | bta-miR-1281 | | bta-miR-1281 | | bta-miR-1281 | | bta-miR-1281 | | bta-miR-1281 | | bta-miR-1281 | | bta-miR-1281 | | bta-miR-1281 | | bta-miR-1281 | | bta-miR-1281 | | bta-miR-1281 | | bta-miR-1281 | | bta-miR-1281 | | bta-miR-1281 | | bta-miR-1281 | | bta-miR-1281 | | bta-miR-1281 | | bta-miR-1281 | | bta-miR-1281 | | bta-miR-1281 | | bta-miR-1281 | | bta-miR-1281 | | bta-miR-1281 | | bta-miR-1281 | | bta-miR-1281 | | bta-miR-1281 | | bta-miR-1281 | | bta-miR-1281 | | bta-miR-1281 | | bta-miR-1281 | | bta-miR-1281 | | bta-miR-1281 | | bta-miR-1343-5p | | bta-miR-1343-5p | | bta-miR-1343-5p | | bta-miR-1343-5p | | bta-miR-1343-5p | | bta-miR-1343-5p | | bta-miR-1343-5p | | bta-miR-1343-5p | | bta-miR-1343-5p | | bta-miR-1343-5p | | bta-miR-1343-5p | | bta-miR-1343-5p | | bta-miR-1343-5p | | bta-miR-1343-5p | | bta-miR-1343-5p | | bta-miR-1343-5p | | bta-miR-1343-5p | | bta-miR-1343-5p | | bta-miR-1343-5p | | bta-miR-1343-5p | | bta-miR-1343-5p | | bta-miR-1343-5p | | bta-miR-1343-5p | | bta-miR-1343-5p | | bta-miR-1343-5p | | bta-miR-1343-5p | | bta-miR-1343-5p | | bta-miR-1343-5p | | bta-miR-1343-5p | | bta-miR-1343-5p | | bta-miR-1343-5p | | bta-miR-1343-5p | | bta-miR-1343-5p | | bta-miR-1343-5p | | bta-miR-1343-5p | | bta-miR-1343-5p | | bta-miR-1343-5p | | bta-miR-1343-5p | | bta-miR-1343-5p | | bta-miR-1343-5p | | bta-miR-1343-5p | | bta-miR-1343-5p | | bta-miR-1343-5p | | bta-miR-1343-5p | | bta-miR-1343-5p | | bta-miR-1343-5p | | bta-miR-1343-5p | | bta-miR-1343-5p | | bta-miR-1343-5p | | bta-miR-1343-5p | | bta-miR-1343-5p | | bta-miR-1343-5p | | bta-miR-1343-5p | | bta-miR-1343-5p | | bta-miR-1343-5p | | bta-miR-1343-5p | | bta-miR-1343-5p | | bta-miR-1343-5p | | bta-miR-1343-5p | | bta-miR-1343-5p | | bta-miR-1343-5p | | bta-miR-1343-5p | | bta-miR-1343-5p | | bta-miR-1343-5p | | bta-miR-1343-5p | | bta-miR-1343-5p | | bta-miR-1343-5p | | bta-miR-1343-5p | | bta-miR-1343-5p | | bta-miR-1343-5p | | bta-miR-1343-5p | | bta-miR-1343-5p | | bta-miR-1343-5p | | bta-miR-1343-5p | | bta-miR-1343-5p | | bta-miR-1343-5p | | bta-miR-1343-5p | | bta-miR-1343-5p | | bta-miR-1343-5p | | bta-miR-1343-5p | | bta-miR-1343-5p | | bta-miR-1343-5p | | bta-miR-1343-5p | | bta-miR-1343-5p | | bta-miR-1343-5p | | bta-miR-1343-5p | | bta-miR-1343-5p | | bta-miR-1343-5p | | bta-miR-1343-5p | | bta-miR-1343-5p | | bta-miR-1343-5p | | bta-miR-1343-5p | | bta-miR-1343-5p | | bta-miR-1343-5p | | bta-miR-1343-5p | | bta-miR-1343-5p | | bta-miR-1343-5p | | bta-miR-1343-5p | | bta-miR-1343-5p | | bta-miR-1343-5p | | bta-miR-1343-5p | | bta-miR-1343-5p | | bta-miR-1343-5p | | bta-miR-1343-5p | | bta-miR-1343-5p | | bta-miR-1343-5p | | bta-miR-1343-5p | | bta-miR-1343-5p | | bta-miR-1343-5p | | bta-miR-1343-5p | | bta-miR-1343-5p | | bta-miR-1343-5p | | bta-miR-1343-5p | | bta-miR-1343-5p | | bta-miR-1343-5p | | bta-miR-1343-5p | | bta-miR-1343-5p | | bta-miR-1343-5p | | bta-miR-1343-5p | | bta-miR-1343-5p | | bta-miR-1343-5p | | bta-miR-1343-5p | | bta-miR-1343-5p | | bta-miR-1343-5p | | bta-miR-1343-5p | | bta-miR-1343-5p | | bta-miR-1343-5p | | bta-miR-1343-5p | | bta-miR-1343-5p | | bta-miR-1343-5p | | bta-miR-1343-5p | | bta-miR-1343-5p | | bta-miR-1343-5p | | bta-miR-1343-5p | | bta-miR-1343-5p | | bta-miR-1343-5p | | bta-miR-1343-5p | | bta-miR-1343-5p | | bta-miR-1343-5p | | bta-miR-1343-5p | | bta-miR-1343-5p | | bta-miR-1343-5p | | bta-miR-1343-5p | | bta-miR-1343-5p | | bta-miR-1343-5p | | bta-miR-1343-5p | | bta-miR-1343-5p | | bta-miR-1343-5p | | bta-miR-1343-5p | | bta-miR-1343-5p | | bta-miR-1343-5p | | bta-miR-1343-5p | | bta-miR-1343-5p | | bta-miR-1343-5p | | bta-miR-1343-5p | | bta-miR-1343-5p | | bta-miR-1343-5p | | bta-miR-1343-5p | | bta-miR-1343-5p | | bta-miR-1343-5p | | bta-miR-1343-5p | | bta-miR-1343-5p | | bta-miR-1343-5p | | bta-miR-1343-5p | | bta-miR-1343-5p | | bta-miR-1343-5p | | bta-miR-1343-5p | | bta-miR-1343-5p | | bta-miR-1343-5p | | bta-miR-1343-5p | | bta-miR-1343-5p | | bta-miR-1343-5p | | bta-miR-1343-5p | | bta-miR-1343-5p | | bta-miR-1343-5p | | bta-miR-1343-5p | | bta-miR-1343-5p | | bta-miR-1343-5p | | bta-miR-1343-5p | | bta-miR-1343-5p | | bta-miR-1343-5p | | bta-miR-1343-5p | | bta-miR-1343-5p | | bta-miR-1343-5p | | bta-miR-1343-5p | | bta-miR-1343-5p | | bta-miR-1343-5p | | bta-miR-1343-5p | | bta-miR-1343-5p | | bta-miR-1343-5p | | bta-miR-1343-5p | | bta-miR-1343-5p | | bta-miR-1343-5p | | bta-miR-1343-5p | | bta-miR-1343-5p | | bta-miR-1343-5p | | bta-miR-1343-5p | | bta-miR-1343-5p | | bta-miR-1343-5p | | bta-miR-1343-5p | | bta-miR-1343-5p | | bta-miR-1343-5p | | bta-miR-1343-5p | | bta-miR-1343-5p | | bta-miR-1343-5p | | bta-miR-1343-5p | | bta-miR-1343-5p | | bta-miR-1343-5p | | bta-miR-1343-5p | | bta-miR-1343-5p | | bta-miR-1343-5p | | bta-miR-1343-5p | | bta-miR-1343-5p | | bta-miR-1343-5p | | bta-miR-1343-5p | | bta-miR-1343-5p | | bta-miR-1343-5p | | bta-miR-1343-5p | | bta-miR-1343-5p | | bta-miR-1343-5p | | bta-miR-1343-5p | | bta-miR-1343-5p | | bta-miR-1343-5p | | bta-miR-1343-5p | | bta-miR-1343-5p | | bta-miR-1343-5p | | bta-miR-1343-5p | | bta-miR-1343-5p | | bta-miR-1343-5p | | bta-miR-1343-5p | | bta-miR-1343-5p | | bta-miR-1343-5p | | bta-miR-1343-5p | | bta-miR-1343-5p | | bta-miR-1343-5p | | bta-miR-1343-5p | | bta-miR-1343-5p | | bta-miR-1343-5p | | bta-miR-1343-5p | | bta-miR-1343-5p | | bta-miR-1343-5p | | | HIST2H3A | | --- | | AL592284.1 | | C22orf46 | | SLC11A1 | | GAB2 | | MANBAL | | LTB | | MSANTD1 | | LIF | | TEX22 | | FAM98A | | CTD-3214H19.16 | | ADAMTS13 | | AGFG2 | | DDX49 | | USP39 | | ZCCHC24 | | SLC25A21 | | CELF1 | | SLC35B2 | | FAM170B | | PRX | | GPR26 | | APOL6 | | LSM12 | | KLHL30 | | BMP8B | | AC074212.3 | | IDH2 | | SH3GLB2 | | FLJ27365 | | PAQR6 | | TSPO2 | | FLJ00418 | | PHB2 | | SCAMP3 | | GRK5 | | RIMS4 | | ZNF70 | | BOK | | NSG2 | | KAZALD1 | | CNIH3 | | FBXW7 | | AC005609.1 | | NAB2 | | SLC39A11 | | BHLHE22 | | KLHL29 | | PMFBP1 | | E4F1 | | CLPP | | NFATC4 | | LDB2 | | C1orf64 | | ZBTB7C | | ZNF575 | | NKX6-3 | | AHRR | | PRX | | KIAA0513 | | KSR2 | | RAB37 | | LY6G6C | | EHD2 | | C17orf103 | | GAS8 | | RGMA | | OSM | | LYPD1 | | PKD1 | | MS4A15 | | GPA33 | | COTL1 | | FKBP1A | | HOXB5 | | SPSB1 | | TFCP2L1 | | TFEB | | FHL3 | | SIPA1L3 | | LDLRAP1 | | KCTD17 | | SIX5 | | KB-1507C5.2 | | MVB12B | | ATG9A | | HMGA1 | | TBC1D13 | | GRB7 | | KLK14 | | UBE2QL1 | | THTPA | | PIRT | | TNS4 | | HEPACAM | | STIM1 | | RRP1 | | PACRG | | PSORS1C1 | | GAREML | | NUPR1 | | SERPINE3 | | AQP5 | | TSTA3 | | GLIS1 | | SEC14L6 | | LY6E | | CAMKV | | TMEM150A | | TMCC2 | | SCAND1 | | LOH12CR1 | | IL17REL | | TMEM27 | | PRRT2 | | ABHD14B | | RNASEH2A | | JPH4 | | NDRG4 | | RARG | | LIF | | CABP7 | | RIMS4 | | AIF1L | | PTMS | | CASQ1 | | SERPINB6 | | GJB4 | | KIAA1644 | | FAM178B | | GPIHBP1 | | BLOC1S3 | | FAM222B | | SLC6A8 | | USP21 | | ZNF703 | | VAMP2 | | ASTN1 | | FCRL6 | | APLNR | | DDX41 | | FAM163A | | WNK2 | | GPRC5A | | CDR2L | | RP11-195F19.5 | | SNX17 | | S100A2 | | CERS3 | | PXN | | CTB-96E2.2 | | C19orf35 | | TAGLN | | KIF17 | | HOXA6 | | CSMD2 | | UQCC1 | | C17orf80 | | PAX8 | | NUDC | | NACC1 | | AC145676.2 | | CNNM4 | | LMAN2L | | PLOD3 | | CALCOCO1 | | AC024940.1 | | CD300LB | | EFHD2 | | CBX2 | | KIF21B | | KIAA0247 | | KDM6B | | CYP46A1 | | PPP2R4 | | FOXI2 | | CRY2 | | STX6 | | PITX1 | | LINC00632 | | RNF222 | | PPARGC1B | | PCYT1B | | KIRREL | | EPB41 | | MEA1 | | VSTM5 | | SERINC2 | | NFAM1 | | TNS1 | | PYGM | | TATDN3 | | CLEC3A | | CTC-360G5.1 | | SHISA9 | | ERGIC1 | | SLC7A5 | | SNCG | | ALX4 | | AGAP2-AS1 | | TNFSF12 | | RHOB | | PPIE | | KRTAP10-1 | | CHST1 | | PVRIG | | KCNMB1 | | MTAP | | PPP2R5D | | PRRG3 | | KCNC3 | | UCP2 | | TAL1 | | AP001652.1 | | NUP98 | | GATS | | AC006946.15 | | TMEM79 | | SNX12 | | CELSR2 | | KRT17 | | NHP2 | | DUSP28 | | RBMXL2 | | PTK2B | | PGS1 | | CSNK2B-LY6G5B-1181 | | GABARAPL1 | | SYNGR1 | | OBP2B | | LOXL1 | | HDAC10 | | EMC10 | | CEACAM1 | | CD7 | | MPP2 | | ELOVL1 | | LZTS2 | | NYAP1 | | DCHS1 | | HRH3 | | CLTCL1 | | NIPSNAP1 | | GSC | | COL5A3 | | ADCYAP1R1 | | NOTUM | | RPP30 | | POLR2J2 | | PNMA6A | | TNNT2 | | ONECUT3 | | POLE3 | | ATXN2L | | C10orf105 | | TBC1D22B | | PRSS42 | | DKFZP434O1614 | | FAM101A | | PPP1R32 | | STC1 | | CYB5R3 | | CCDC142 | | C6orf223 | | ATP6V0D1 | | C2orf62 | | PPP5C | | IRGQ | | CCL22 | | ZDHHC7 | | TRIM3 | | WDTC1 | | COLQ | | JUP | | LEPREL4 | | NTN3 | | DCAKD | | C1orf134 | | ELOVL2 | | PRKCG | | FOXM1 | | RPH3A | | TMEM151B | | R3HCC1 | | VPS53 | | CCDC149 | | LDLRAD2 | | GABBR2 | | RHBDF2 | | CX3CL1 | | LBH | | ICAM1 | | ABHD17A | | TBC1D16 | | GDF11 | | CNOT3 | | GINS2 | | ANGPTL6 | | FBXO31 | | | -1.22 | | --- | | -1 | | -0.96 | | -0.94 | | -0.89 | | -0.83 | | -0.83 | | -0.8 | | -0.8 | | -0.8 | | -0.78 | | -0.78 | | -0.78 | | -0.76 | | -0.76 | | -0.69 | | -0.69 | | -0.65 | | -0.64 | | -0.64 | | -0.64 | | -0.64 | | -0.63 | | -0.63 | | -0.6 | | -0.59 | | -0.59 | | -0.59 | | -0.58 | | -0.58 | | -0.58 | | -0.57 | | -0.57 | | -0.56 | | -0.56 | | -0.56 | | -0.56 | | -0.55 | | -0.55 | | -0.55 | | -0.54 | | -0.54 | | -0.54 | | -0.54 | | -0.53 | | -0.53 | | -0.53 | | -0.52 | | -0.52 | | -0.52 | | -0.52 | | -0.52 | | -0.52 | | -0.51 | | -0.51 | | -0.51 | | -0.5 | | -0.5 | | -0.5 | | -1.51 | | -1.48 | | -1.29 | | -1.27 | | -1.24 | | -1.22 | | -1.13 | | -1.1 | | -1.03 | | -1 | | -0.95 | | -0.95 | | -0.95 | | -0.95 | | -0.92 | | -0.91 | | -0.91 | | -0.86 | | -0.86 | | -0.86 | | -0.86 | | -0.85 | | -0.84 | | -0.83 | | -0.83 | | -0.82 | | -0.82 | | -0.8 | | -0.8 | | -0.79 | | -0.79 | | -0.78 | | -0.78 | | -0.77 | | -0.77 | | -0.77 | | -0.77 | | -0.77 | | -0.76 | | -0.76 | | -0.76 | | -0.76 | | -0.75 | | -0.75 | | -0.75 | | -0.75 | | -0.75 | | -0.74 | | -0.74 | | -0.74 | | -0.73 | | -0.73 | | -0.73 | | -0.72 | | -0.72 | | -0.71 | | -0.71 | | -0.71 | | -0.71 | | -0.71 | | -0.71 | | -0.7 | | -0.7 | | -0.7 | | -0.7 | | -0.7 | | -0.7 | | -0.7 | | -0.7 | | -0.7 | | -0.7 | | -0.69 | | -0.69 | | -0.68 | | -0.68 | | -0.68 | | -0.68 | | -0.68 | | -0.67 | | -0.67 | | -0.67 | | -0.67 | | -0.67 | | -0.67 | | -0.67 | | -0.66 | | -0.66 | | -0.66 | | -0.66 | | -0.66 | | -0.66 | | -0.65 | | -0.65 | | -0.65 | | -0.65 | | -0.65 | | -0.65 | | -0.65 | | -0.65 | | -0.64 | | -0.64 | | -0.64 | | -0.64 | | -0.64 | | -0.64 | | -0.64 | | -0.64 | | -0.64 | | -0.64 | | -0.64 | | -0.64 | | -0.64 | | -0.64 | | -0.63 | | -0.63 | | -0.63 | | -0.63 | | -0.63 | | -0.62 | | -0.62 | | -0.62 | | -0.62 | | -0.62 | | -0.62 | | -0.62 | | -0.62 | | -0.62 | | -0.62 | | -0.61 | | -0.61 | | -0.61 | | -0.61 | | -0.61 | | -0.61 | | -0.6 | | -0.6 | | -0.6 | | -0.6 | | -0.6 | | -0.6 | | -0.6 | | -0.59 | | -0.59 | | -0.59 | | -0.59 | | -0.59 | | -0.59 | | -0.59 | | -0.59 | | -0.59 | | -0.59 | | -0.59 | | -0.59 | | -0.58 | | -0.58 | | -0.58 | | -0.58 | | -0.58 | | -0.58 | | -0.58 | | -0.58 | | -0.57 | | -0.57 | | -0.57 | | -0.57 | | -0.57 | | -0.57 | | -0.57 | | -0.57 | | -0.57 | | -0.57 | | -0.57 | | -0.56 | | -0.56 | | -0.56 | | -0.56 | | -0.56 | | -0.56 | | -0.56 | | -0.56 | | -0.56 | | -0.56 | | -0.56 | | -0.56 | | -0.55 | | -0.55 | | -0.55 | | -0.55 | | -0.55 | | -0.55 | | -0.55 | | -0.55 | | -0.55 | | -0.55 | | -0.55 | | -0.55 | | -0.55 | | -0.55 | | -0.55 | | -0.55 | | -0.55 | | -0.55 | | -0.55 | | -0.54 | | -0.54 | | -0.54 | | -0.54 | | -0.54 | | -0.54 | | -0.54 | | -0.54 | | -0.54 | | -0.54 | | -0.54 | | -0.54 | | -0.54 | | -0.54 | | -0.54 | | -0.54 | | -0.53 | | -0.53 | | -0.53 | | -0.53 | | -0.53 | | -0.53 | | -0.53 | | -0.53 | | -0.53 | | -0.53 | | -0.53 | | -0.53 | | -0.52 | | -0.52 | | -0.52 | | -0.52 | | -0.52 | | -0.52 | | -0.52 | | -0.52 | | -0.52 | | -0.52 | | | bta-miR-1343-5p | | --- | | bta-miR-1343-5p | | bta-miR-1343-5p | | bta-miR-1343-5p | | bta-miR-1343-5p | | bta-miR-1343-5p | | bta-miR-1343-5p | | bta-miR-1343-5p | | bta-miR-1343-5p | | bta-miR-1343-5p | | bta-miR-1343-5p | | bta-miR-1343-5p | | bta-miR-1343-5p | | bta-miR-1343-5p | | bta-miR-1343-5p | | bta-miR-1343-5p | | bta-miR-1343-5p | | bta-miR-1343-5p | | bta-miR-1343-5p | | bta-miR-1343-5p | | bta-miR-1343-5p | | bta-miR-1343-5p | | bta-miR-1343-5p | | bta-miR-1343-5p | | bta-miR-1343-5p | | bta-miR-1343-5p | | bta-miR-1343-5p | | bta-miR-1343-5p | | bta-miR-1343-5p | | bta-miR-1343-5p | | bta-miR-1343-5p | | bta-miR-1343-5p | | bta-miR-1343-5p | | bta-miR-1343-5p | | bta-miR-1343-5p | | bta-miR-1343-5p | | bta-miR-2885 | | bta-miR-2885 | | bta-miR-2885 | | bta-miR-2885 | | bta-miR-2885 | | bta-miR-2885 | | bta-miR-2885 | | bta-miR-2885 | | bta-miR-2885 | | bta-miR-2885 | | bta-miR-2885 | | bta-miR-2885 | | bta-miR-2885 | | bta-miR-2885 | | bta-miR-2885 | | bta-miR-2885 | | bta-miR-2885 | | bta-miR-2885 | | bta-miR-2885 | | bta-miR-2885 | | bta-miR-2885 | | bta-miR-2885 | | bta-miR-2885 | | bta-miR-2885 | | bta-miR-2885 | | bta-miR-2885 | | bta-miR-2885 | | bta-miR-2885 | | bta-miR-2885 | | bta-miR-2885 | | bta-miR-2885 | | bta-miR-2885 | | bta-miR-2885 | | bta-miR-2885 | | bta-miR-2885 | | bta-miR-2885 | | bta-miR-2885 | | bta-miR-2885 | | bta-miR-2885 | | bta-miR-2885 | | bta-miR-2885 | | bta-miR-2885 | | bta-miR-2885 | | bta-miR-2885 | | bta-miR-2885 | | bta-miR-2885 | | bta-miR-2885 | | bta-miR-2885 | | bta-miR-2885 | | bta-miR-2885 | | bta-miR-2885 | | bta-miR-2885 | | bta-miR-2885 | | bta-miR-2885 | | bta-miR-2885 | | bta-miR-2885 | | bta-miR-2885 | | bta-miR-2885 | | bta-miR-2885 | | bta-miR-2885 | | bta-miR-2885 | | bta-miR-2885 | | bta-miR-2885 | | bta-miR-2885 | | bta-miR-2885 | | bta-miR-2885 | | bta-miR-2885 | | bta-miR-2885 | | bta-miR-2885 | | bta-miR-2885 | | bta-miR-2885 | | bta-miR-2885 | | bta-miR-2885 | | bta-miR-2885 | | bta-miR-2885 | | bta-miR-2885 | | bta-miR-2885 | | bta-miR-2885 | | bta-miR-2885 | | bta-miR-2885 | | bta-miR-2885 | | bta-miR-2885 | | bta-miR-2885 | | bta-miR-2885 | | bta-miR-2885 | | bta-miR-2885 | | bta-miR-2885 | | bta-miR-2885 | | bta-miR-2885 | | bta-miR-2885 | | bta-miR-2885 | | bta-miR-2885 | | bta-miR-2885 | | bta-miR-2885 | | bta-miR-2885 | | bta-miR-2885 | | bta-miR-2885 | | bta-miR-2885 | | bta-miR-2885 | | bta-miR-2885 | | bta-miR-2885 | | bta-miR-2885 | | bta-miR-2885 | | bta-miR-2885 | | bta-miR-2885 | | bta-miR-2885 | | bta-miR-2885 | | bta-miR-2885 | | bta-miR-2885 | | bta-miR-2885 | | bta-miR-2885 | | bta-miR-2885 | | bta-miR-2885 | | bta-miR-2885 | | bta-miR-2885 | | bta-miR-2885 | | bta-miR-2885 | | bta-miR-2885 | | bta-miR-2885 | | bta-miR-2885 | | bta-miR-2885 | | bta-miR-2885 | | bta-miR-2885 | | bta-miR-2885 | | bta-miR-2885 | | bta-miR-2885 | | bta-miR-2885 | | bta-miR-2885 | | bta-miR-2885 | | bta-miR-2885 | | bta-miR-2885 | | bta-miR-2885 | | bta-miR-2885 | | bta-miR-450b | | bta-miR-450b | | bta-miR-450b | | bta-miR-450b | | bta-miR-450b | | bta-miR-450b | | bta-miR-450b | | bta-miR-450b | | bta-miR-450b | | bta-miR-450b | | bta-miR-450b | | bta-miR-450b | | bta-miR-450b | | bta-miR-450b | | bta-miR-450b | | bta-miR-450b | | bta-miR-450b | | bta-miR-450b | | bta-miR-760-5p | | bta-miR-760-5p | | bta-miR-760-5p | | bta-miR-760-5p | | bta-miR-760-5p | | bta-miR-760-5p | | bta-miR-760-5p | | bta-miR-760-5p | | bta-miR-760-5p | | bta-miR-760-5p | | bta-miR-760-5p | | bta-miR-760-5p | | bta-miR-760-5p | | bta-miR-760-5p | | bta-miR-760-5p | | bta-miR-760-5p | | bta-miR-760-5p | | bta-miR-760-5p | | bta-miR-760-5p | | bta-miR-760-5p | | bta-miR-760-5p | | bta-miR-760-5p | | bta-miR-760-5p | | bta-miR-760-5p | | bta-miR-760-5p | | bta-miR-760-5p | | bta-miR-760-5p | | bta-miR-760-5p | | bta-miR-760-5p | | bta-miR-760-5p | | bta-miR-760-5p | | bta-miR-760-5p | | bta-miR-760-5p | | bta-miR-760-5p | | bta-miR-760-5p | | bta-miR-760-5p | | bta-miR-760-5p | | bta-miR-760-5p | | bta-miR-760-5p | | bta-miR-760-5p | | bta-miR-760-5p | | bta-miR-760-5p | | bta-miR-760-5p | | bta-miR-760-5p | | bta-miR-760-5p | | bta-miR-760-5p | | bta-miR-760-5p | | bta-miR-760-5p | | bta-miR-760-5p | | bta-miR-760-5p | | bta-miR-760-5p | | bta-miR-760-5p | | bta-miR-760-5p | | bta-miR-760-5p | | bta-miR-760-5p | | bta-miR-760-5p | | bta-miR-760-5p | | bta-miR-760-5p | | bta-miR-760-5p | | bta-miR-760-5p | | bta-miR-760-5p | | bta-miR-760-5p | | bta-miR-760-5p | | bta-miR-760-5p | | bta-miR-760-5p | | bta-miR-760-5p | | bta-miR-760-5p | | bta-miR-760-5p | | bta-miR-760-5p | | bta-miR-760-5p | | bta-miR-760-5p | | bta-miR-760-5p | | bta-miR-760-5p | | bta-miR-760-5p | | bta-miR-760-5p | | bta-miR-760-5p | | bta-miR-760-5p | | bta-miR-760-5p | | bta-miR-760-5p | | bta-miR-760-5p | | bta-miR-760-5p | | bta-miR-760-5p | | bta-miR-3613b | | bta-miR-3613b | | bta-miR-3613b | | bta-miR-3613b | | bta-miR-3613b | | bta-miR-3613b | | bta-miR-3613b | | bta-miR-3613b | | bta-miR-3613b | | bta-miR-3613b | | bta-miR-3613b | | bta-miR-3613b | | bta-miR-3613b | | bta-miR-3613b | | bta-miR-3613b | | bta-miR-3613b | | bta-miR-3613b | | bta-miR-3613b | | bta-miR-3613b | | bta-miR-3613b | | bta-miR-3613b | | bta-miR-3613b | | bta-miR-3613b | | bta-miR-3613b | | bta-miR-3613b | | bta-miR-3613b | | bta-miR-3613b | | bta-miR-3613b | | bta-miR-3613b | | bta-miR-3613b | | bta-miR-3613b | | bta-miR-3613b | | | TUBB4A | | --- | | ZBTB46 | | SH3TC2 | | ATP5D | | RAX | | RNF165 | | MMP24 | | SELRC1 | | LPCAT3 | | VAT1 | | USP46 | | SZT2 | | CTRL | | SLC16A2 | | C11orf42 | | TOM1L2 | | PLEKHG4 | | KRTAP10-9 | | THY1 | | PRR11 | | GRINA | | GIPR | | TEX35 | | GAS2L2 | | TRPM4 | | TMEM222 | | C9orf171 | | BAHD1 | | TPRG1L | | UROC1 | | PROSC | | RCN3 | | DPF1 | | SH2B1 | | RASD2 | | RALB | | RGMA | | WNK2 | | PLA2G1B | | SLC25A28 | | YIF1B | | AGFG2 | | RAX | | MZF1 | | FAM73B | | LENG8 | | LTBP4 | | CERS1 | | CABP1 | | MARK4 | | AL450307.1 | | VAMP8 | | SPSB4 | | NKX2-5 | | CCDC64 | | C3orf20 | | DKFZP779J2370 | | UBALD1 | | FAM219A | | PTBP1 | | PACSIN2 | | AL590822.1 | | PEG10 | | FTCDNL1 | | MIB2 | | ATAD3B | | IQSEC2 | | MAP2K3 | | HDAC11 | | C17orf103 | | ACVR1B | | PTCD2 | | AC002472.13 | | FLJ45079 | | REPIN1 | | REXO2 | | FOSB | | GTF2IRD1 | | TFAP2A | | TXNRD3 | | CTC1 | | ZNF827 | | CTXN1 | | PI4KB | | PRKAR1B | | KLHL18 | | EXTL1 | | MIDN | | MEX3B | | TOX2 | | EDNRA | | C20orf26 | | DOLPP1 | | PCGF3 | | VPS37B | | HSPB6 | | TWIST2 | | SHISA6 | | ICOSLG | | ATP13A2 | | AC026703.1 | | TLR4 | | LEMD2 | | VAT1L | | CDK3 | | FOXK1 | | CRTC1 | | TUFT1 | | RP4-559A3.7 | | CHMP7 | | HRAS | | TMEM129 | | EEPD1 | | MYO9B | | ZFP36L1 | | MVB12B | | MAP2K7 | | GORASP1 | | TTYH3 | | TRPC5 | | RASA4 | | OAF | | APOC4 | | NCS1 | | C10orf105 | | LRRC8A | | ARHGAP35 | | PDCD5 | | CBX2 | | RPS6KA2 | | CORO7 | | ATG4B | | CRB2 | | MOCS1 | | CCHCR1 | | JPH4 | | BRSK2 | | SBK2 | | FAM126A | | RBM38 | | CAMK2N2 | | ATG16L1 | | MEGF8 | | CYTH1 | | TMEM222 | | MEF2A | | ASIC3 | | C19orf26 | | FAM155A | | SEMA4D | | HIC2 | | CST5 | | KLHL26 | | ATP6V0C | | MSRB3 | | MUSTN1 | | SMG6 | | CALY | | TCN2 | | KIF21B | | EZR | | CACNA2D2 | | KLF13 | | ONECUT3 | | NRARP | | PRR18 | | ADRA2B | | KIAA0556 | | PAX2 | | CAMK2N1 | | C2orf74 | | RP11-169F17.1 | | CHMP2B | | RAB40A | | XRCC4 | | CT62 | | RAET1L | | SPTSSB | | UBD | | ZNF23 | | CDKN2C | | PARK7 | | SLC17A6 | | C15orf32 | | B2M | | TFRC | | TRO | | CD300LB | | GORASP1 | | AC016722.1 | | CT62 | | GLIPR2 | | SLC4A11 | | RHOU | | OR5AU1 | | PNKD | | OR1L3 | | DOCK1 | | PRPH2 | | DMKN | | DNAJC15 | | LRP11 | | POSTN | | CYHR1 | | SLC25A45 | | AC004899.1 | | TMED4 | | POLR2J2 | | KCTD11 | | PAX8 | | SLC26A10 | | ZFP36 | | LTA | | DDIT4 | | ELAVL4 | | ZNF3 | | APH1A | | RPGRIP1 | | C14orf132 | | FAM109A | | KRTAP9-7 | | SEC13 | | PON2 | | GEMIN2 | | TBC1D10C | | SLC25A48 | | WFDC2 | | ESM1 | | ILF2 | | NAT9 | | ICAM2 | | SLC29A2 | | SYP | | ACR | | GDE1 | | HPDL | | RP11-144F15.1 | | ARFRP1 | | C16orf91 | | CHP2 | | BCL2L2 | | C12orf5 | | GOT1 | | PCBD2 | | DLK2 | | CDK6 | | CACNG8 | | TMEM169 | | AL450307.1 | | RAD54B | | OR10A4 | | ENDOV | | MRPS18B | | GIMAP6 | | TWIST1 | | C17orf64 | | DAPP1 | | JPH2 | | STMN4 | | SH2D2A | | MLANA | | ARHGEF2 | | WNT9B | | KDM1A | | ASIC4 | | PRNT | | RASSF2 | | OR4M2 | | BCL2L1 | | HSD17B12 | | LONRF2 | | MFN2 | | RHOQ | | KPNA6 | | USP38 | | MRRF | | CDK12 | | GAS7 | | TMBIM6 | | USP42 | | KDELR2 | | ZFP37 | | CCDC132 | | ZIC5 | | SNX30 | | SIK2 | | IKZF4 | | ARHGAP35 | | FAM126A | | GOLT1B | | CEP128 | | GLE1 | | AGAP2 | | RBM25 | | LGI2 | | GAPVD1 | | UBR2 | | CPD | | DEDD | | CELF2 | | FGFBP2 | | | -0.51 | | --- | | -0.51 | | -0.51 | | -0.51 | | -0.51 | | -0.51 | | -0.51 | | -0.51 | | -0.51 | | -0.51 | | -0.51 | | -0.51 | | -0.51 | | -0.51 | | -0.51 | | -0.5 | | -0.5 | | -0.5 | | -0.5 | | -0.5 | | -0.5 | | -0.5 | | -0.5 | | -0.5 | | -0.5 | | -0.5 | | -0.5 | | -0.5 | | -0.5 | | -0.5 | | -0.5 | | -0.5 | | -0.5 | | -0.5 | | -0.5 | | -0.5 | | -1.23 | | -1.13 | | -1.08 | | -1.02 | | -0.95 | | -0.95 | | -0.91 | | -0.86 | | -0.86 | | -0.85 | | -0.83 | | -0.83 | | -0.83 | | -0.83 | | -0.82 | | -0.81 | | -0.81 | | -0.8 | | -0.8 | | -0.79 | | -0.78 | | -0.76 | | -0.75 | | -0.75 | | -0.75 | | -0.75 | | -0.74 | | -0.73 | | -0.73 | | -0.73 | | -0.72 | | -0.71 | | -0.71 | | -0.71 | | -0.71 | | -0.71 | | -0.7 | | -0.7 | | -0.7 | | -0.69 | | -0.68 | | -0.68 | | -0.68 | | -0.67 | | -0.67 | | -0.67 | | -0.67 | | -0.67 | | -0.66 | | -0.66 | | -0.66 | | -0.66 | | -0.65 | | -0.65 | | -0.65 | | -0.65 | | -0.64 | | -0.64 | | -0.64 | | -0.63 | | -0.62 | | -0.62 | | -0.62 | | -0.62 | | -0.61 | | -0.61 | | -0.61 | | -0.6 | | -0.6 | | -0.6 | | -0.6 | | -0.6 | | -0.59 | | -0.59 | | -0.59 | | -0.59 | | -0.58 | | -0.58 | | -0.58 | | -0.58 | | -0.57 | | -0.57 | | -0.57 | | -0.57 | | -0.56 | | -0.56 | | -0.56 | | -0.56 | | -0.56 | | -0.56 | | -0.56 | | -0.56 | | -0.56 | | -0.56 | | -0.55 | | -0.55 | | -0.55 | | -0.55 | | -0.55 | | -0.54 | | -0.54 | | -0.54 | | -0.53 | | -0.53 | | -0.53 | | -0.53 | | -0.53 | | -0.52 | | -0.52 | | -0.52 | | -0.52 | | -0.52 | | -0.52 | | -0.51 | | -0.51 | | -0.51 | | -0.51 | | -0.51 | | -0.51 | | -0.51 | | -0.51 | | -0.51 | | -0.51 | | -0.51 | | -0.5 | | -0.5 | | -0.5 | | -0.5 | | -0.5 | | -0.5 | | -0.5 | | -0.5 | | -0.5 | | -1.01 | | -0.67 | | -0.67 | | -0.66 | | -0.64 | | -0.63 | | -0.62 | | -0.62 | | -0.6 | | -0.59 | | -0.57 | | -0.57 | | -0.55 | | -0.55 | | -0.54 | | -0.53 | | -0.53 | | -0.51 | | -1.29 | | -1.27 | | -0.99 | | -0.98 | | -0.93 | | -0.9 | | -0.87 | | -0.85 | | -0.84 | | -0.84 | | -0.82 | | -0.81 | | -0.78 | | -0.77 | | -0.76 | | -0.75 | | -0.75 | | -0.74 | | -0.73 | | -0.73 | | -0.73 | | -0.72 | | -0.72 | | -0.71 | | -0.7 | | -0.68 | | -0.67 | | -0.67 | | -0.67 | | -0.67 | | -0.67 | | -0.66 | | -0.66 | | -0.65 | | -0.64 | | -0.64 | | -0.63 | | -0.63 | | -0.62 | | -0.61 | | -0.59 | | -0.58 | | -0.58 | | -0.58 | | -0.58 | | -0.57 | | -0.57 | | -0.57 | | -0.57 | | -0.56 | | -0.56 | | -0.56 | | -0.56 | | -0.56 | | -0.56 | | -0.55 | | -0.55 | | -0.55 | | -0.54 | | -0.54 | | -0.54 | | -0.54 | | -0.54 | | -0.53 | | -0.53 | | -0.53 | | -0.53 | | -0.53 | | -0.52 | | -0.52 | | -0.52 | | -0.52 | | -0.51 | | -0.51 | | -0.5 | | -0.5 | | -0.5 | | -0.5 | | -0.5 | | -0.5 | | -0.5 | | -0.5 | | -1 | | -1 | | -1 | | -1 | | -1 | | -1 | | -1 | | -1 | | -1 | | -1 | | -1 | | -1 | | -1 | | -1 | | -1 | | -1 | | -1 | | -1 | | -1 | | -1 | | -1 | | -1 | | -1 | | -1 | | -1 | | -1 | | -1 | | -1 | | -1 | | -1 | | -0.92 | | -0.54 | |

**Table S3. Predicted mRNA targets of miRNAs differentially expressed between blastocyst SG SM vs. blastocyst FG SM.**

| **miRNAs** | **Genes** | **Cumulative Context Score** | **miRNAs** | **Genes** | **Cumulative Context Score** |
| --- | --- | --- | --- | --- | --- |
| | bta-miR-2296 | | --- | | bta-miR-2296 | | bta-miR-2296 | | bta-miR-2296 | | bta-miR-2296 | | bta-miR-2296 | | bta-miR-2296 | | bta-miR-2296 | | bta-miR-2296 | | bta-miR-2296 | | bta-miR-2296 | | bta-miR-2296 | | bta-miR-2296 | | bta-miR-2296 | | bta-miR-2296 | | bta-miR-2296 | | bta-miR-2296 | | bta-miR-2296 | | bta-miR-2296 | | bta-miR-2296 | | bta-miR-2296 | | bta-miR-2296 | | bta-miR-2296 | | bta-miR-2296 | | bta-miR-2296 | | bta-miR-2296 | | bta-miR-2296 | | bta-miR-2296 | | bta-miR-2296 | | bta-miR-2296 | | bta-miR-2296 | | bta-miR-2296 | | bta-miR-2296 | | bta-miR-2296 | | bta-miR-2296 | | bta-miR-2296 | | bta-miR-2296 | | bta-miR-2296 | | bta-miR-2296 | | bta-miR-2296 | | bta-miR-2296 | | bta-miR-2296 | | bta-miR-2296 | | bta-miR-2296 | | bta-miR-2296 | | bta-miR-2296 | | bta-miR-450b | | bta-miR-450b | | bta-miR-450b | | bta-miR-450b | | bta-miR-450b | | bta-miR-450b | | bta-miR-450b | | bta-miR-450b | | bta-miR-450b | | bta-miR-450b | | bta-miR-450b | | bta-miR-450b | | bta-miR-450b | | bta-miR-450b | | bta-miR-450b | | bta-miR-450b | | bta-miR-450b | | bta-miR-450b | | bta-miR-6535 | | bta-miR-6535 | | bta-miR-6535 | | bta-miR-6535 | | bta-miR-6535 | | bta-miR-6535 | | bta-miR-6535 | | bta-miR-6535 | | bta-miR-6535 | | bta-miR-6535 | | bta-miR-6535 | | bta-miR-6535 | | bta-miR-6535 | | bta-miR-6535 | | bta-miR-6535 | | bta-miR-6535 | | bta-miR-6535 | | bta-miR-6535 | | bta-miR-6535 | | bta-miR-6535 | | bta-miR-6535 | | bta-miR-6535 | | bta-miR-6535 | | bta-miR-6535 | | bta-miR-6535 | | bta-miR-6535 | | bta-miR-6535 | | bta-miR-6535 | | bta-miR-6535 | | bta-miR-6535 | | bta-miR-6535 | | bta-miR-6535 | | bta-miR-6535 | | bta-miR-6535 | | bta-miR-6535 | | bta-miR-6535 | | bta-miR-6535 | | bta-miR-6535 | | bta-miR-6535 | | bta-miR-6535 | | bta-miR-6535 | | bta-miR-6535 | | bta-miR-6535 | | bta-miR-6535 | | bta-miR-6535 | | bta-miR-6535 | | bta-miR-6535 | | bta-miR-6535 | | bta-miR-6535 | | bta-miR-6535 | | bta-miR-6535 | | bta-miR-6535 | | bta-miR-6535 | | bta-miR-6535 | | bta-miR-6535 | | bta-miR-6535 | | bta-miR-6535 | | bta-miR-6535 | | bta-miR-6535 | | bta-miR-6535 | | bta-miR-6535 | | bta-miR-6535 | | bta-miR-6535 | | bta-miR-6535 | | bta-miR-6535 | | bta-miR-6535 | | bta-miR-6535 | | bta-miR-6535 | | bta-miR-6535 | | bta-miR-6535 | | bta-miR-6535 | | bta-miR-6535 | | bta-miR-6535 | | bta-miR-6535 | | bta-miR-6535 | | bta-miR-6535 | | bta-miR-6535 | | bta-miR-6535 | | bta-miR-6535 | | bta-miR-6535 | | bta-miR-6535 | | bta-miR-6535 | | bta-miR-6535 | | bta-miR-6535 | | bta-miR-6535 | | bta-miR-6535 | | bta-miR-6535 | | bta-miR-6535 | | bta-miR-6535 | | bta-miR-6535 | | bta-miR-6535 | | bta-miR-6535 | | bta-miR-6535 | | bta-miR-6535 | | bta-miR-6535 | | bta-miR-6535 | | bta-miR-6535 | | bta-miR-6535 | | bta-miR-6535 | | bta-miR-6535 | | bta-miR-6535 | | bta-miR-6535 | | bta-miR-6535 | | bta-miR-6535 | | bta-miR-6535 | | bta-miR-6535 | | bta-miR-6535 | | bta-miR-6535 | | bta-miR-6535 | | bta-miR-6535 | | bta-miR-6535 | | bta-miR-6535 | | bta-miR-6535 | | bta-miR-6535 | | bta-miR-6535 | | bta-miR-6535 | | bta-miR-6535 | | bta-miR-6535 | | bta-miR-6535 | | bta-miR-6535 | | bta-miR-6535 | | bta-miR-6535 | | bta-miR-6535 | | bta-miR-6535 | | bta-miR-6535 | | bta-miR-6535 | | bta-miR-6535 | | bta-miR-6535 | | bta-miR-6535 | | bta-miR-6535 | | bta-miR-6535 | | bta-miR-6535 | | bta-miR-6535 | | bta-miR-6535 | | bta-miR-6535 | | bta-miR-6535 | | bta-miR-6535 | | bta-miR-6535 | | bta-miR-6535 | | bta-miR-6535 | | bta-miR-6535 | | bta-miR-6535 | | bta-miR-6535 | | bta-miR-6535 | | bta-miR-6535 | | bta-miR-6535 | | bta-miR-6535 | | bta-miR-6535 | | bta-miR-6535 | | bta-miR-6535 | | bta-miR-6535 | | bta-miR-6535 | | bta-miR-6535 | | bta-miR-6535 | | bta-miR-6535 | | bta-miR-6535 | | bta-miR-6535 | | bta-miR-6535 | | bta-miR-6535 | | bta-miR-6535 | | bta-miR-6535 | | bta-miR-6535 | | bta-miR-6535 | | bta-miR-6535 | | bta-miR-6535 | | bta-miR-6535 | | bta-miR-6535 | | bta-miR-6535 | | bta-miR-6535 | | bta-miR-6535 | | bta-miR-6535 | | bta-miR-6535 | | bta-miR-6535 | | bta-miR-6535 | | bta-miR-6535 | | bta-miR-6535 | | bta-miR-6535 | | bta-miR-6535 | | bta-miR-6535 | | bta-miR-6535 | | bta-miR-6535 | | bta-miR-6535 | | bta-miR-6535 | | bta-miR-6535 | | bta-miR-6535 | | bta-miR-6535 | | bta-miR-6535 | | bta-miR-6535 | | bta-miR-6535 | | bta-miR-6535 | | bta-miR-6535 | | bta-miR-6535 | | bta-miR-6535 | | bta-miR-6535 | | bta-miR-6535 | | bta-miR-6535 | | bta-miR-6535 | | bta-miR-6535 | | bta-miR-6535 | | bta-miR-6535 | | bta-miR-6535 | | bta-miR-6535 | | bta-miR-6535 | | bta-miR-6535 | | bta-miR-6535 | | bta-miR-6535 | | bta-miR-6535 | | bta-miR-6535 | | bta-miR-6535 | | bta-miR-6535 | | bta-miR-6535 | | bta-miR-6535 | | bta-miR-6535 | | bta-miR-6535 | | bta-miR-6535 | | bta-miR-6535 | | bta-miR-6535 | | bta-miR-6535 | | bta-miR-6535 | | bta-miR-6535 | | bta-miR-6535 | | bta-miR-6535 | | bta-miR-6535 | | bta-miR-6535 | | bta-miR-6535 | | bta-miR-6535 | | bta-miR-6535 | | bta-miR-6535 | | bta-miR-6535 | | bta-miR-6535 | | bta-miR-6535 | | bta-miR-6535 | | bta-miR-6535 | | bta-miR-6535 | | bta-miR-6535 | | bta-miR-6535 | | bta-miR-6535 | | bta-miR-6535 | | bta-miR-6535 | | bta-miR-6535 | | bta-miR-6535 | | bta-miR-6535 | | bta-miR-6535 | | bta-miR-6535 | | bta-miR-6535 | | bta-miR-6535 | | bta-miR-6535 | | bta-miR-6535 | | bta-miR-6535 | | bta-miR-6535 | | bta-miR-6535 | | bta-miR-6535 | | bta-miR-6535 | | bta-miR-6535 | | bta-miR-6535 | | bta-miR-6535 | | bta-miR-6535 | | bta-miR-6535 | | bta-miR-6535 | | bta-miR-6535 | | bta-miR-6535 | | bta-miR-6535 | | bta-miR-6535 | | bta-miR-6535 | | bta-miR-6535 | | bta-miR-6535 | | bta-miR-6535 | | bta-miR-6535 | | bta-miR-6535 | | bta-miR-6535 | | bta-miR-6535 | | bta-miR-6535 | | bta-miR-6535 | | bta-miR-6535 | | bta-miR-6535 | | bta-miR-6535 | | bta-miR-6535 | | bta-miR-6535 | | bta-miR-6535 | | bta-miR-6535 | | bta-miR-6535 | | bta-miR-6535 | | bta-miR-6535 | | bta-miR-6535 | | bta-miR-6535 | | bta-miR-6535 | | bta-miR-6535 | | bta-miR-6535 | | bta-miR-6535 | | bta-miR-6535 | | bta-miR-6535 | | bta-miR-6535 | | bta-miR-6535 | | bta-miR-6535 | | bta-miR-6535 | | bta-miR-6535 | | bta-miR-6535 | | bta-miR-6535 | | bta-miR-760-5p | | bta-miR-760-5p | | bta-miR-760-5p | | bta-miR-760-5p | | bta-miR-760-5p | | bta-miR-760-5p | | bta-miR-760-5p | | bta-miR-760-5p | | bta-miR-760-5p | | bta-miR-760-5p | | bta-miR-760-5p | | bta-miR-760-5p | | bta-miR-760-5p | | bta-miR-760-5p | | bta-miR-760-5p | | bta-miR-760-5p | | bta-miR-760-5p | | bta-miR-760-5p | | bta-miR-760-5p | | bta-miR-760-5p | | bta-miR-760-5p | | bta-miR-760-5p | | bta-miR-760-5p | | bta-miR-760-5p | | bta-miR-760-5p | | bta-miR-760-5p | | bta-miR-760-5p | | bta-miR-760-5p | | bta-miR-760-5p | | bta-miR-760-5p | | bta-miR-760-5p | | bta-miR-760-5p | | bta-miR-760-5p | | bta-miR-760-5p | | bta-miR-760-5p | | bta-miR-760-5p | | bta-miR-760-5p | | bta-miR-760-5p | | bta-miR-760-5p | | bta-miR-760-5p | | bta-miR-760-5p | | bta-miR-760-5p | | bta-miR-760-5p | | bta-miR-760-5p | | bta-miR-760-5p | | bta-miR-760-5p | | bta-miR-760-5p | | bta-miR-760-5p | | bta-miR-760-5p | | bta-miR-760-5p | | bta-miR-760-5p | | bta-miR-760-5p | | bta-miR-760-5p | | bta-miR-760-5p | | bta-miR-760-5p | | bta-miR-760-5p | | bta-miR-760-5p | | bta-miR-760-5p | | bta-miR-760-5p | | bta-miR-760-5p | | bta-miR-760-5p | | bta-miR-760-5p | | bta-miR-760-5p | | bta-miR-760-5p | | bta-miR-760-5p | | bta-miR-760-5p | | bta-miR-760-5p | | bta-miR-760-5p | | bta-miR-760-5p | | bta-miR-760-5p | | bta-miR-760-5p | | bta-miR-760-5p | | bta-miR-760-5p | | bta-miR-760-5p | | bta-miR-760-5p | | bta-miR-760-5p | | | AK2 | | --- | | AP001579.1 | | ASB16 | | BARHL2 | | BBS7 | | C3orf65 | | C7orf13 | | C7orf76 | | C9orf24 | | C9orf78 | | CCDC77 | | CD226 | | CHSY3 | | CLDN22 | | CYP3A43 | | DEFB127 | | DEPDC4 | | EFCAB10 | | ERCC8 | | FABP4 | | GPA33 | | HDGFRP3 | | KANSL1L | | KCNC2 | | KCNIP4 | | KIFC1 | | LST1 | | OSBPL10 | | PAX4 | | PCED1B | | PIM2 | | PRAMEF18 | | PTMA | | RP11-181C3.1 | | RP11-404P21.8 | | RP11-422N16.3 | | SKP1 | | TCF7L2 | | TDRD10 | | TIGD3 | | TMEM51 | | TMEM66 | | TSNAX | | UNC45A | | WNT2 | | ZNF791 | | B2M | | C15orf32 | | C2orf74 | | CAMK2N1 | | CDKN2C | | CHMP2B | | CT62 | | PARK7 | | RAB40A | | RAET1L | | RP11-169F17.1 | | SLC17A6 | | SPTSSB | | TFRC | | TRO | | UBD | | XRCC4 | | ZNF23 | | AC012215.1 | | AC093802.1 | | ACOT8 | | ADRA2A | | AGPAT3 | | AL117190.3 | | ALKBH5 | | AMOT | | AMOTL2 | | ANKRD52 | | AP1M2 | | APLN | | APOC4 | | ARF3 | | ARL2 | | ARNT2 | | ARRB1 | | ASNA1 | | ATCAY | | ATP6V0A1 | | ATP6V0E2 | | ATXN7L3 | | BAIAP2L2 | | BARHL1 | | BCAT2 | | BCL2L2 | | BEST3 | | C10orf111 | | C11orf68 | | C19orf35 | | C1orf134 | | C1orf172 | | C1QL1 | | C20orf27 | | C20orf96 | | C21orf67 | | C2orf91 | | CACNB1 | | CACNG7 | | CALCOCO1 | | CALM2 | | CAMK2A | | CD300LB | | CD300LG | | CDCA3 | | CDKN1A | | CHCHD5 | | CHRNA7 | | CHST1 | | CHST3 | | CLEC3A | | CLSTN3 | | CNN1 | | CNTFR | | CNTROB | | CPLX2 | | CRLF1 | | CSDC2 | | CST9 | | CTNNBIP1 | | CTNND1 | | CTXN1 | | CXorf24 | | DAGLA | | DCX | | DCXR | | DDAH1 | | DIRAS2 | | DKFZP761J1410 | | DPF2 | | DPP10 | | DTX3 | | EFNB1 | | EFS | | EGR3 | | ELAVL3 | | ELN | | ELOVL4 | | EPHA8 | | ETV1 | | ETV6 | | FAM83F | | FBRS | | FBXL19 | | FGF14 | | FOSB | | FOXL2 | | FOXN2 | | FXYD4 | | FXYD7 | | FZD4 | | GAL3ST1 | | GAS8 | | GATS | | GDF5 | | GIGYF1 | | GLO1 | | GLYR1 | | GPATCH2L | | GPHA2 | | GPR17 | | HM13 | | HMGA1 | | HOXB1 | | HOXB3 | | HOXC4 | | HVCN1 | | IER3 | | IGDCC4 | | IGF2 | | IL1RN | | IL2RG | | ITFG2 | | ITIH5 | | ITPKB | | JMJD7-PLA2G4B | | JPH4 | | KCNAB2 | | KCNC1 | | KCND3 | | KCNK3 | | KIAA0040 | | KIAA0391 | | KIF21B | | KLF12 | | KLF16 | | KLK6 | | KMT2D | | KRT16 | | KSR2 | | LAMTOR1 | | LASP1 | | LAT | | LCE2B | | LCE2D | | LEFTY2 | | LEPROT | | LHB | | LIF | | LIMD2 | | LMTK3 | | LRFN1 | | LY6E | | MAP2K7 | | MARCKSL1 | | MARK2 | | MAX | | MAZ | | MDGA1 | | MED30 | | METTL3 | | MFAP2 | | MLN | | MN1 | | MON1A | | MSI1 | | MVB12B | | NAB2 | | NCR3 | | NDP | | NEUROD2 | | NFAM1 | | NFATC2 | | NFIC | | NOTCH3 | | NOVA2 | | NPTX1 | | NPTXR | | NRG1 | | NXPH2 | | ONECUT3 | | OST4 | | OXT | | PACS1 | | PACSIN1 | | PAFAH1B2 | | PCBP4 | | PCDH1 | | PCSK2 | | PHF1 | | PIANP | | PLA2G6 | | PNMA6A | | POU2F2 | | POU3F1 | | PPARD | | PPDPF | | PPP1R18 | | PRKAG1 | | PRKCB | | PTGER4 | | PVRL1 | | RAB11FIP5 | | RAB15 | | RAB35 | | RAD54B | | RARG | | RASL10B | | REEP2 | | RHOB | | RHOG | | RNF141 | | RNF39 | | ROGDI | | RP11-111M22.2 | | RP11-159G9.5 | | RP11-247C2.2 | | RP6-24A23.6 | | RPS15 | | RPS6KA4 | | RPS9 | | RTBDN | | RUNX3 | | SAMD10 | | SAMD12 | | SBK1 | | SCAMP5 | | SCGN | | SCRT2 | | SEPN1 | | SEPT6 | | SF3B3 | | SHISA6 | | SLC11A1 | | SLC25A23 | | SLC31A2 | | SLC39A13 | | SLC7A1 | | SLC7A8 | | SLFN13 | | SMG6 | | SNX33 | | SOCS3 | | SOX12 | | SP2 | | SRF | | ST3GAL5 | | STAT3 | | STK35 | | STX1B | | STXBP1 | | SYNGAP1 | | SYNGR1 | | SYNGR4 | | SYT5 | | TAF6 | | TBKBP1 | | TBR1 | | TCL1A | | THRA | | TMEM109 | | TMEM127 | | TMEM132E | | TMEM184B | | TMEM229B | | TMEM59L | | TMEM95 | | TNFSF12 | | TP53INP2 | | TPBGL | | TPPP3 | | TRIM46 | | TRIM7 | | TSPAN11 | | TSPAN18 | | TSPYL2 | | U2AF2 | | UBA1 | | UBALD1 | | UBL5 | | UBTF | | UNC119B | | UNC13A | | VAMP1 | | VPS52 | | VPS72 | | VSTM2L | | VSX2 | | VTI1A | | WNT5A | | WWOX | | XKR7 | | YBX2 | | ZBTB16 | | ZBTB37 | | ZBTB7A | | ZC4H2 | | ZDHHC6 | | ZFP91 | | ZFR | | ZNF30 | | ZNF385A | | ZNF395 | | ZNF488 | | ZNF512 | | ZNF557 | | ZNF558 | | ZSWIM1 | | AC004899.1 | | AC016722.1 | | ACR | | AL450307.1 | | APH1A | | ARFRP1 | | ARHGEF2 | | ASIC4 | | BCL2L1 | | BCL2L2 | | C12orf5 | | C14orf132 | | C16orf91 | | C17orf64 | | CACNG8 | | CD300LB | | CDK6 | | CHP2 | | CT62 | | CYHR1 | | DAPP1 | | DDIT4 | | DLK2 | | DMKN | | DNAJC15 | | DOCK1 | | ELAVL4 | | ENDOV | | ESM1 | | FAM109A | | GDE1 | | GEMIN2 | | GIMAP6 | | GLIPR2 | | GORASP1 | | GOT1 | | HPDL | | ICAM2 | | ILF2 | | JPH2 | | KCTD11 | | KDM1A | | KRTAP9-7 | | LRP11 | | LTA | | MLANA | | MRPS18B | | NAT9 | | OR10A4 | | OR1L3 | | OR4M2 | | OR5AU1 | | PAX8 | | PCBD2 | | PNKD | | POLR2J2 | | PON2 | | POSTN | | PRNT | | PRPH2 | | RAD54B | | RASSF2 | | RHOU | | RP11-144F15.1 | | RPGRIP1 | | SEC13 | | SH2D2A | | SLC25A45 | | SLC25A48 | | SLC26A10 | | SLC29A2 | | SLC4A11 | | STMN4 | | SYP | | TBC1D10C | | TMED4 | | | -0.59 | | --- | | -0.57 | | -0.57 | | -0.56 | | -0.54 | | -0.54 | | -0.53 | | -0.79 | | -0.74 | | -0.55 | | -0.5 | | -0.64 | | -0.51 | | -0.86 | | -0.51 | | -0.76 | | -0.63 | | -0.56 | | -0.66 | | -0.66 | | -0.6 | | -0.64 | | -0.63 | | -0.57 | | -0.51 | | -0.57 | | -0.66 | | -0.55 | | -0.52 | | -0.74 | | -0.76 | | -0.6 | | -0.6 | | -0.51 | | -0.5 | | -0.76 | | -0.57 | | -0.69 | | -0.81 | | -0.52 | | -0.78 | | -0.53 | | -0.5 | | -0.61 | | -0.69 | | -0.95 | | -0.53 | | -0.54 | | -0.67 | | -1.01 | | -0.57 | | -0.66 | | -0.62 | | -0.55 | | -0.64 | | -0.62 | | -0.67 | | -0.55 | | -0.6 | | -0.53 | | -0.51 | | -0.59 | | -0.63 | | -0.57 | | -0.51 | | -0.81 | | -0.7 | | -0.83 | | -0.55 | | -0.54 | | -0.52 | | -0.55 | | -0.62 | | -0.94 | | -0.85 | | -0.75 | | -0.65 | | -0.96 | | -0.58 | | -0.52 | | -0.67 | | -0.59 | | -0.57 | | -0.55 | | -0.81 | | -0.9 | | -0.55 | | -0.59 | | -0.71 | | -0.81 | | -0.58 | | -0.69 | | -0.53 | | -0.68 | | -0.53 | | -0.57 | | -0.52 | | -0.54 | | -0.64 | | -0.59 | | -0.78 | | -0.69 | | -0.95 | | -0.78 | | -0.69 | | -0.55 | | -0.64 | | -0.55 | | -0.72 | | -0.6 | | -0.51 | | -0.51 | | -0.52 | | -0.57 | | -0.54 | | -0.52 | | -0.54 | | -0.51 | | -0.56 | | -0.51 | | -0.68 | | -0.75 | | -0.51 | | -0.55 | | -0.54 | | -0.56 | | -0.59 | | -0.59 | | -0.55 | | -0.5 | | -0.61 | | -0.65 | | -0.75 | | -0.59 | | -0.73 | | -0.85 | | -1.01 | | -0.51 | | -0.58 | | -0.8 | | -0.94 | | -0.53 | | -0.59 | | -0.52 | | -0.83 | | -0.61 | | -0.88 | | -0.56 | | -0.69 | | -0.99 | | -0.54 | | -0.53 | | -0.53 | | -0.6 | | -0.72 | | -0.82 | | -0.95 | | -0.75 | | -0.52 | | -0.61 | | -0.69 | | -0.63 | | -0.58 | | -0.72 | | -0.53 | | -0.88 | | -0.81 | | -0.83 | | -1.21 | | -0.63 | | -0.68 | | -0.61 | | -0.54 | | -0.65 | | -0.98 | | -0.8 | | -0.5 | | -0.5 | | -0.79 | | -0.63 | | -0.86 | | -0.61 | | -0.5 | | -0.5 | | -0.56 | | -0.72 | | -0.57 | | -1.13 | | -0.75 | | -0.57 | | -0.67 | | -0.64 | | -0.54 | | -1.23 | | -0.6 | | -0.99 | | -0.75 | | -0.53 | | -0.9 | | -0.59 | | -0.74 | | -0.54 | | -0.5 | | -0.66 | | -0.5 | | -0.61 | | -0.66 | | -0.91 | | -0.5 | | -0.54 | | -0.59 | | -0.61 | | -0.62 | | -0.5 | | -0.53 | | -0.5 | | -0.53 | | -0.9 | | -0.57 | | -0.88 | | -0.53 | | -0.69 | | -0.86 | | -0.57 | | -0.53 | | -0.53 | | -0.56 | | -0.84 | | -0.73 | | -0.93 | | -0.68 | | -0.88 | | -0.7 | | -0.67 | | -0.87 | | -0.5 | | -0.56 | | -0.56 | | -0.58 | | -0.61 | | -0.54 | | -1.02 | | -0.72 | | -0.54 | | -0.72 | | -0.7 | | -0.63 | | -0.55 | | -0.6 | | -0.56 | | -0.77 | | -0.87 | | -0.5 | | -0.56 | | -0.67 | | -0.92 | | -0.63 | | -0.61 | | -0.57 | | -0.57 | | -0.58 | | -0.61 | | -0.65 | | -0.67 | | -0.73 | | -0.58 | | -0.51 | | -0.87 | | -0.52 | | -0.63 | | -0.57 | | -1.19 | | -0.52 | | -0.83 | | -0.75 | | -0.77 | | -0.92 | | -0.68 | | -0.5 | | -0.9 | | -0.66 | | -0.72 | | -0.9 | | -0.51 | | -0.53 | | -0.54 | | -0.55 | | -0.63 | | -0.84 | | -0.65 | | -0.58 | | -0.51 | | -0.64 | | -0.56 | | -0.71 | | -0.57 | | -0.65 | | -0.81 | | -0.52 | | -0.73 | | -0.55 | | -0.56 | | -1.31 | | -0.51 | | -0.54 | | -1.1 | | -1.14 | | -0.67 | | -0.52 | | -0.7 | | -0.51 | | -0.58 | | -0.64 | | -1.37 | | -0.5 | | -0.53 | | -0.56 | | -0.51 | | -1.4 | | -0.64 | | -0.54 | | -0.58 | | -0.57 | | -0.8 | | -0.5 | | -0.6 | | -0.7 | | -0.77 | | -0.74 | | -0.88 | | -0.6 | | -0.55 | | -0.76 | | -0.52 | | -0.72 | | -0.53 | | -1.17 | | -0.72 | | -0.66 | | -0.74 | | -0.69 | | -0.69 | | -0.53 | | -0.66 | | -0.57 | | -0.77 | | -0.53 | | -0.56 | | -0.67 | | -1.48 | | -0.66 | | -0.56 | | -0.54 | | -0.57 | | -0.55 | | -1.06 | | -0.57 | | -0.53 | | -0.77 | | -0.58 | | -0.63 | | -0.72 | | -0.73 | | -0.99 | | -0.57 | | -0.54 | | -0.67 | | -0.56 | | -0.5 | | -0.5 | | -0.5 | | -0.56 | | -0.56 | | -0.66 | | -0.56 | | -0.52 | | -0.54 | | -1.29 | | -0.54 | | -0.56 | | -0.98 | | -0.75 | | -0.52 | | -0.67 | | -0.55 | | -0.78 | | -0.77 | | -0.82 | | -0.67 | | -0.53 | | -0.59 | | -0.66 | | -0.57 | | -0.63 | | -0.53 | | -0.93 | | -1.27 | | -0.55 | | -0.57 | | -0.58 | | -0.58 | | -0.52 | | -0.72 | | -0.5 | | -0.65 | | -0.76 | | -0.68 | | -0.51 | | -0.53 | | -0.58 | | -0.53 | | -0.84 | | -0.5 | | -0.85 | | -0.72 | | -0.55 | | -0.84 | | -0.73 | | -0.64 | | -0.75 | | -0.5 | | -0.81 | | -0.54 | | -0.5 | | -0.87 | | -0.56 | | -0.67 | | -0.64 | | -0.51 | | -0.74 | | -0.62 | | -0.71 | | -0.58 | | -0.9 | | -0.52 | | -0.57 | | -0.63 | | -0.73 | | | bta-miR-760-5p | | --- | | bta-miR-760-5p | | bta-miR-760-5p | | bta-miR-760-5p | | bta-miR-760-5p | | bta-miR-760-5p | | bta-miR-17-5p | | bta-miR-17-5p | | bta-miR-17-5p | | bta-miR-17-5p | | bta-miR-17-5p | | bta-miR-17-5p | | bta-miR-17-5p | | bta-miR-17-5p | | bta-miR-17-5p | | bta-miR-17-5p | | bta-miR-17-5p | | bta-miR-17-5p | | bta-miR-17-5p | | bta-miR-17-5p | | bta-miR-17-5p | | bta-miR-23a | | bta-miR-23a | | bta-miR-23a | | bta-miR-23a | | bta-miR-23a | | bta-miR-23a | | bta-miR-23a | | bta-miR-23a | | bta-miR-23a | | bta-miR-23a | | bta-miR-23a | | bta-miR-23a | | bta-miR-23a | | bta-miR-23a | | bta-miR-23a | | bta-miR-23a | | bta-miR-23a | | bta-miR-23a | | bta-miR-23a | | bta-miR-23a | | bta-miR-23a | | bta-miR-23a | | bta-miR-23a | | bta-miR-23a | | bta-miR-23a | | bta-miR-23a | | bta-miR-23a | | bta-miR-23b-3p | | bta-miR-23b-3p | | bta-miR-23b-3p | | bta-miR-23b-3p | | bta-miR-23b-3p | | bta-miR-23b-3p | | bta-miR-23b-3p | | bta-miR-23b-3p | | bta-miR-23b-3p | | bta-miR-24-3p | | bta-miR-24-3p | | bta-miR-24-3p | | bta-miR-24-3p | | bta-miR-24-3p | | bta-miR-24-3p | | bta-miR-24-3p | | bta-miR-24-3p | | bta-miR-24-3p | | bta-miR-24-3p | | bta-miR-24-3p | | bta-miR-24-3p | | bta-miR-24-3p | | bta-miR-24-3p | | bta-miR-24-3p | | bta-miR-24-3p | | bta-miR-24-3p | | bta-miR-24-3p | | bta-miR-24-3p | | bta-miR-24-3p | | bta-miR-24-3p | | bta-miR-24-3p | | bta-miR-24-3p | | bta-miR-24-3p | | bta-miR-24-3p | | bta-miR-24-3p | | bta-miR-24-3p | | bta-miR-24-3p | | bta-miR-24-3p | | bta-miR-24-3p | | bta-miR-24-3p | | bta-miR-24-3p | | bta-miR-24-3p | | bta-miR-24-3p | | bta-miR-24-3p | | bta-miR-24-3p | | bta-miR-24-3p | | bta-miR-24-3p | | bta-miR-24-3p | | bta-miR-24-3p | | bta-miR-24-3p | | bta-miR-24-3p | | bta-miR-24-3p | | bta-miR-24-3p | | bta-miR-24-3p | | bta-miR-24-3p | | bta-miR-24-3p | | bta-miR-24-3p | | bta-miR-24-3p | | bta-miR-24-3p | | bta-miR-24-3p | | bta-miR-24-3p | | bta-miR-24-3p | | bta-miR-24-3p | | bta-miR-2402 | | bta-miR-2402 | | bta-miR-2402 | | bta-miR-2402 | | bta-miR-2402 | | bta-miR-2402 | | bta-miR-2402 | | bta-miR-2402 | | bta-miR-2402 | | bta-miR-2402 | | bta-miR-2402 | | bta-miR-2402 | | bta-miR-2402 | | bta-miR-2402 | | bta-miR-2402 | | bta-miR-2402 | | bta-miR-2402 | | bta-miR-2402 | | bta-miR-2402 | | bta-miR-2402 | | bta-miR-2402 | | bta-miR-2402 | | bta-miR-2402 | | bta-miR-2402 | | bta-miR-2402 | | bta-miR-2402 | | bta-miR-2402 | | bta-miR-2402 | | bta-miR-2402 | | bta-miR-2402 | | bta-miR-2402 | | bta-miR-2402 | | bta-miR-2402 | | bta-miR-2402 | | bta-miR-2402 | | bta-miR-2402 | | bta-miR-2402 | | bta-miR-2402 | | bta-miR-2402 | | bta-miR-2402 | | bta-miR-2402 | | bta-miR-2402 | | bta-miR-2898 | | bta-miR-2898 | | bta-miR-2898 | | bta-miR-2898 | | bta-miR-2898 | | bta-miR-2898 | | bta-miR-2898 | | bta-miR-2898 | | bta-miR-2898 | | bta-miR-2898 | | bta-miR-2898 | | bta-miR-2898 | | bta-miR-2898 | | bta-miR-2898 | | bta-miR-2898 | | bta-miR-2898 | | bta-miR-2898 | | bta-miR-2898 | | bta-miR-2898 | | bta-miR-2898 | | bta-miR-2898 | | bta-miR-2898 | | bta-miR-2898 | | bta-miR-2898 | | bta-miR-2898 | | bta-miR-2898 | | bta-miR-2898 | | bta-miR-2898 | | bta-miR-2898 | | bta-miR-2898 | | bta-miR-2898 | | bta-miR-2898 | | bta-miR-2898 | | bta-miR-2898 | | bta-miR-2898 | | bta-miR-2898 | | bta-miR-2898 | | bta-miR-2898 | | bta-miR-2898 | | bta-miR-2898 | | bta-miR-2898 | | bta-miR-2898 | | bta-miR-2898 | | bta-miR-2898 | | bta-miR-2898 | | bta-miR-2898 | | bta-miR-2898 | | bta-miR-2898 | | bta-miR-2898 | | bta-miR-2898 | | bta-miR-2898 | | bta-miR-2898 | | bta-miR-2898 | | bta-miR-2898 | | bta-miR-2898 | | bta-miR-2898 | | bta-miR-2898 | | bta-miR-2898 | | bta-miR-2898 | | bta-miR-2898 | | bta-miR-2898 | | bta-miR-2898 | | bta-miR-2898 | | bta-miR-2898 | | bta-miR-2898 | | bta-miR-2898 | | bta-miR-2898 | | bta-miR-2898 | | bta-miR-2898 | | bta-miR-2898 | | bta-miR-2898 | | bta-miR-2898 | | bta-miR-2898 | | bta-miR-2898 | | bta-miR-2898 | | bta-miR-2898 | | bta-miR-2898 | | bta-miR-2898 | | bta-miR-2898 | | bta-miR-2898 | | bta-miR-2898 | | bta-miR-2898 | | bta-miR-2898 | | bta-miR-2898 | | bta-miR-2898 | | bta-miR-2898 | | bta-miR-2898 | | bta-miR-2898 | | bta-miR-2898 | | bta-miR-2898 | | bta-miR-2898 | | bta-miR-2898 | | bta-miR-2898 | | bta-miR-2898 | | bta-miR-2898 | | bta-miR-2898 | | bta-miR-2898 | | bta-miR-2898 | | bta-miR-2898 | | bta-miR-2898 | | bta-miR-2898 | | bta-miR-2898 | | bta-miR-2898 | | bta-miR-2898 | | bta-miR-2898 | | bta-miR-2898 | | bta-miR-2898 | | bta-miR-2898 | | bta-miR-2898 | | bta-miR-2898 | | bta-miR-2898 | | bta-miR-2898 | | bta-miR-2898 | | bta-miR-2898 | | bta-miR-2898 | | bta-miR-2898 | | bta-miR-2898 | | bta-miR-2898 | | bta-miR-2898 | | bta-miR-2898 | | bta-miR-2898 | | bta-miR-2898 | | bta-miR-2898 | | bta-miR-2898 | | bta-miR-2898 | | bta-miR-2898 | | bta-miR-2898 | | bta-miR-2898 | | bta-miR-2898 | | bta-miR-2898 | | bta-miR-2898 | | bta-miR-2898 | | bta-miR-2898 | | bta-miR-2898 | | bta-miR-2898 | | bta-miR-2898 | | bta-miR-2898 | | bta-miR-320a | | bta-miR-320a | | bta-miR-320a | | bta-miR-320a | | bta-miR-320a | | bta-miR-320a | | bta-miR-320a | | bta-miR-320a | | bta-miR-320a | | bta-miR-320a | | bta-miR-615 | | bta-miR-615 | | bta-miR-615 | | bta-miR-615 | | bta-miR-615 | | bta-miR-615 | | bta-miR-615 | | bta-miR-615 | | bta-miR-615 | | bta-miR-615 | | bta-miR-615 | | bta-miR-615 | | bta-miR-615 | | bta-miR-615 | | bta-miR-615 | | bta-miR-615 | | bta-miR-615 | | bta-miR-615 | | bta-miR-615 | | bta-miR-615 | | bta-miR-615 | | bta-miR-615 | | bta-miR-615 | | bta-miR-615 | | bta-miR-615 | | bta-miR-615 | | bta-miR-615 | | bta-miR-615 | | bta-miR-615 | | bta-miR-615 | | bta-miR-615 | | bta-miR-615 | | bta-miR-615 | | bta-miR-615 | | bta-miR-615 | | bta-miR-615 | | bta-miR-615 | | bta-miR-615 | | bta-miR-615 | | bta-miR-615 | | bta-miR-615 | | bta-miR-615 | | bta-miR-615 | | bta-miR-615 | | bta-miR-615 | | bta-miR-615 | | bta-miR-615 | | bta-miR-615 | | bta-miR-615 | | bta-miR-615 | | bta-miR-615 | | bta-miR-615 | | bta-miR-615 | | bta-miR-615 | | bta-miR-615 | | bta-miR-615 | | bta-miR-615 | | bta-miR-615 | | bta-miR-615 | | bta-miR-615 | | bta-miR-615 | | bta-miR-615 | | bta-miR-615 | | bta-miR-615 | | bta-miR-615 | | bta-miR-615 | | bta-miR-615 | | bta-miR-615 | | bta-miR-615 | | bta-miR-615 | | bta-miR-615 | | bta-miR-615 | | bta-miR-615 | | bta-miR-615 | | bta-miR-615 | | bta-miR-615 | | bta-miR-615 | | bta-miR-615 | | bta-miR-615 | | bta-miR-615 | | bta-miR-615 | | bta-miR-615 | | bta-miR-615 | | bta-miR-615 | | bta-miR-615 | | bta-miR-615 | | bta-miR-615 | | bta-miR-615 | | bta-miR-615 | | bta-miR-615 | | bta-miR-615 | | bta-miR-615 | | bta-miR-615 | | bta-miR-615 | | bta-miR-615 | | bta-miR-615 | | bta-miR-615 | | bta-miR-615 | | bta-miR-615 | | bta-miR-615 | | bta-miR-615 | | bta-miR-615 | | bta-miR-615 | | bta-miR-615 | | bta-miR-615 | | bta-miR-615 | | bta-miR-615 | | bta-miR-615 | | bta-miR-615 | | bta-miR-615 | | bta-miR-615 | | bta-miR-615 | | bta-miR-615 | | bta-miR-615 | | bta-miR-615 | | bta-miR-615 | | bta-miR-615 | | bta-miR-615 | | bta-miR-615 | | bta-miR-615 | | bta-miR-615 | | bta-miR-615 | | bta-miR-615 | | bta-miR-615 | | bta-miR-615 | | bta-miR-615 | | bta-miR-615 | | bta-miR-615 | | bta-miR-615 | | bta-miR-615 | | bta-miR-615 | | bta-miR-615 | | bta-miR-615 | | bta-miR-615 | | bta-miR-615 | | bta-miR-615 | | bta-miR-615 | | bta-miR-615 | | | TMEM169 | | --- | | TWIST1 | | WFDC2 | | WNT9B | | ZFP36 | | ZNF3 | | GPR6 | | PDCD1LG2 | | CCL1 | | PKD2 | | HAUS8 | | PTHLH | | IRF9 | | DERL2 | | RHOC | | PLEKHA3 | | C7orf43 | | IL6ST | | AGFG2 | | SEMA4B | | RASL11B | | ZNF655 | | ACVR1C | | TFRC | | PNRC2 | | PKP4 | | SNRPC | | PDE4B | | PFDN6 | | ZNF23 | | YES1 | | TOP1 | | CCDC82 | | TFPI2 | | DHFR | | PNMA1 | | LRAT | | RALYL | | PDE7A | | C10orf118 | | SETD8 | | IGSF8 | | PKIA | | B3GNT1 | | MYL12B | | HMGB2 | | SATB1 | | ANKHD1 | | SS18L2 | | ELF5 | | ERBB2IP | | WBP2 | | PPM1D | | AUH | | SLC1A1 | | ZIC5 | | RAB39B | | STRADB | | TCF7 | | C12orf43 | | ENTPD6 | | LSM10 | | SNN | | GBA2 | | SLCO2B1 | | BCL2L11 | | FAM78B | | DNAJB12 | | TSPAN14 | | LMBR1L | | KCNK2 | | FASLG | | FST | | ALAD | | RAB3IL1 | | NEFM | | CCDC58 | | RAP1B | | WNT8B | | SCML1 | | MIDN | | ABCB9 | | VAMP5 | | ZNF697 | | UBALD2 | | SIRPA | | IFNG | | BBC3 | | C10orf62 | | ATG4A | | LIMD2 | | HNF1B | | AC005003.1 | | SLC25A39 | | TRIM55 | | RAP1A | | TOP1 | | CDKN1B | | CLLU1 | | KCTD21 | | RNF138 | | FAM45A | | CAMK2B | | B3GNT5 | | RNF115 | | C8orf58 | | TSC22D2 | | STC2 | | C16orf59 | | SNTB1 | | RAB4B | | C1orf134 | | ZMAT3 | | GDI2 | | MRPL32 | | AC117834.1 | | C19orf53 | | GABRA2 | | UBE2V2 | | AC069547.1 | | TMEM239 | | PLN | | LYPLA1 | | TMEM182 | | MPPED2 | | KCMF1 | | PRIM2 | | SFRP5 | | ALOX15 | | CLRN3 | | FLI1 | | LDOC1L | | RINT1 | | MORC1 | | IL33 | | CYTH3 | | CGNL1 | | PLP1 | | OLA1 | | CYP2C18 | | FBXO38 | | UHMK1 | | PPM1A | | GALNT3 | | PAPPA-AS1 | | KLC4 | | BNIP2 | | FAM64A | | PLD6 | | NPY2R | | SLAMF8 | | RP11-192H23.4 | | TAF13 | | PXK | | CAPN6 | | C21orf67 | | CTF1 | | IGF2R | | C15orf32 | | SNURF | | PRR18 | | PRB3 | | KRTAP1-3 | | C17orf72 | | GPR173 | | KRTAP21-2 | | CABP2 | | UBE2L3 | | TMEM30C | | AGFG2 | | CBLN3 | | ONECUT3 | | LELP1 | | PHLDA2 | | SYNDIG1L | | TXNL4A | | CCL11 | | CCDC86 | | ASCL4 | | C6orf25 | | KRTAP4-8 | | COMMD7 | | RP11-3B7.1 | | PRSS37 | | FKBP9 | | PIANP | | GOLGA7B | | ZNF488 | | NICN1 | | IGFL1 | | SHISA7 | | TMEM213 | | RGS8 | | NRSN2 | | GPX3 | | DBNDD2 | | C11orf82 | | CDK6 | | MRPS18B | | PABPC1L | | PRR24 | | SCGN | | NDUFAF2 | | ZBED3 | | GAPDH | | AL161915.1 | | AKR1B15 | | DKKL1 | | PCGF2 | | SIX2 | | MRAP | | AKR1B10 | | TEX35 | | MYF5 | | MOGAT2 | | DRAXIN | | RBFOX3 | | BSND | | BCL2L1 | | SLC8A2 | | C5orf51 | | CTPS2 | | RSPO4 | | PROK1 | | SH2D4B | | KHDRBS3 | | HSPB8 | | TUBB4A | | AC026310.1 | | SHISA6 | | FAM193B | | TMEM178B | | HOXC12 | | SLC10A3 | | DLX6 | | AC019171.1 | | CALN1 | | S100A14 | | SCN3B | | VAMP2 | | HDGFRP3 | | TLCD1 | | CLPS | | SASH3 | | ISM1 | | C15orf57 | | DAB2IP | | RAB5C | | PURA | | SNAPC3 | | IQCF3 | | SRF | | MC5R | | ZNF213 | | CD247 | | TBC1D14 | | FUK | | XXcos-LUCA11.5 | | ACADS | | SNTA1 | | TBL1X | | CCDC25 | | DEFB132 | | FAM155B | | TSPAN18 | | EFNA3 | | HSPB6 | | ARMC10 | | CIR1 | | HMOX1 | | SARS | | AC005609.1 | | EIF3L | | ACTN1 | | LDOC1 | | PCDH11X | | NAPA | | PHYHIP | | PPM1N | | PYDC1 | | TNS1 | | GBX2 | | PTMA | | MARCH9 | | AKR1E2 | | RANBP10 | | LHCGR | | CNTD1 | | CLPSL1 | | NTM | | ST7-OT4 | | IFT27 | | PCDHA1 | | PBX3 | | ST8SIA4 | | VKORC1L1 | | TFRC | | RP11-160N1.10 | | GTPBP8 | | CTPS1 | | SOD3 | | HSPB7 | | C4orf6 | | SPRED3 | | SLC25A23 | | FOXP3 | | SRRM4 | | ASTN2 | | CERS1 | | DERL3 | | SHMT1 | | GIPC3 | | TSSK6 | | DGCR2 | | LST1 | | UPK3A | | CTB-54O9.9 | | LRRK1 | | RP11-429E11.3 | | PARP14 | | CENPB | | CD3E | | CDH4 | | AC016722.1 | | ADM2 | | RPE | | HSF1 | | LENEP | | NEDD8 | | IKBKB | | HSD11B2 | | CTD-2207O23.12 | | DMPK | | ENPP7 | | CD19 | | CTDSP1 | | ANKRD63 | | FGFBP2 | | AL138847.1 | | ELP5 | | RHOC | | CTC1 | | BEAN1 | | PRKAR1B | | LTB | | LILRB3 | | LAMA5 | | RERG | | HINT2 | | AC004899.1 | | P2RX6 | | EDA | | MAZ | | ALDH16A1 | | URAD | | BHLHA15 | | MSLN | | PACSIN1 | | ARIH2 | | CLIP3 | | FAM83A | | CHST13 | | PARP6 | | SNAI1 | | SYNGR1 | | STX1A | | RAB24 | | SYNGR2 | | ZNF410 | | ATCAY | | ZBTB47 | | TMEM119 | | CDC16 | | KCTD15 | | IFITM5 | | TCF19 | | ZDHHC24 | | KCNQ3 | | MEIS2 | | PAPPA-AS1 | | ITPKB | | ECE1 | | C7orf50 | | PDXP | | PODXL2 | | FAM189A1 | | DDR1 | | ONECUT3 | | LILRA6 | | ECHDC3 | | ZDHHC22 | | RGMA | | MAP2K3 | | TNFRSF18 | | SPATA8 | | ANKRD35 | | FIZ1 | | DND1 | | ALPP | | KY | | FAM43B | | INSRR | | GTF3C5 | | PRR24 | | ASPHD2 | | SSTR5 | | PRR18 | | ARMC5 | | C9orf141 | | FBXL12 | | C17orf103 | | SGCA | | COLQ | | HHLA2 | | C10orf82 | | EDN3 | | DRAXIN | | NECAB3 | | NCAM1 | | NKD1 | | CYP3A5 | | CAPN15 | | WNT10B | | C10orf55 | | SH3PXD2A | | ASPA | | FAM105A | | VKORC1 | | ADAM12 | | KREMEN2 | | PRICKLE2 | | PRR15L | | CCDC155 | | C2orf48 | | CDC14A | | TPM3 | | TMEM217 | | FGD5 | | | -0.54 | | --- | | -0.53 | | -0.61 | | -0.5 | | -0.7 | | -0.67 | | -0.89 | | -0.88 | | -0.79 | | -0.73 | | -0.69 | | -0.64 | | -0.63 | | -0.6 | | -0.57 | | -0.53 | | -0.53 | | -0.52 | | -0.52 | | -0.51 | | -0.5 | | -1.15 | | -0.92 | | -0.77 | | -0.76 | | -0.75 | | -0.7 | | -0.65 | | -0.62 | | -0.59 | | -0.59 | | -0.59 | | -0.58 | | -0.58 | | -0.58 | | -0.56 | | -0.56 | | -0.56 | | -0.55 | | -0.54 | | -0.54 | | -0.53 | | -0.53 | | -0.53 | | -0.53 | | -0.51 | | -0.51 | | -0.5 | | -1.09 | | -0.81 | | -0.59 | | -0.55 | | -0.54 | | -0.53 | | -0.52 | | -0.5 | | -0.5 | | -0.85 | | -0.84 | | -0.84 | | -0.84 | | -0.79 | | -0.78 | | -0.76 | | -0.75 | | -0.74 | | -0.72 | | -0.67 | | -0.67 | | -0.67 | | -0.66 | | -0.65 | | -0.65 | | -0.62 | | -0.61 | | -0.61 | | -0.61 | | -0.6 | | -0.59 | | -0.59 | | -0.59 | | -0.59 | | -0.58 | | -0.58 | | -0.57 | | -0.57 | | -0.56 | | -0.56 | | -0.56 | | -0.56 | | -0.54 | | -0.53 | | -0.53 | | -0.53 | | -0.53 | | -0.53 | | -0.52 | | -0.52 | | -0.52 | | -0.52 | | -0.52 | | -0.51 | | -0.51 | | -0.51 | | -0.51 | | -0.51 | | -0.5 | | -0.5 | | -0.5 | | -0.5 | | -0.5 | | -0.98 | | -0.87 | | -0.86 | | -0.84 | | -0.81 | | -0.77 | | -0.74 | | -0.73 | | -0.69 | | -0.65 | | -0.64 | | -0.62 | | -0.62 | | -0.6 | | -0.59 | | -0.59 | | -0.59 | | -0.59 | | -0.58 | | -0.58 | | -0.57 | | -0.56 | | -0.54 | | -0.54 | | -0.54 | | -0.53 | | -0.53 | | -0.53 | | -0.53 | | -0.52 | | -0.52 | | -0.52 | | -0.52 | | -0.52 | | -0.51 | | -0.51 | | -0.51 | | -0.51 | | -0.51 | | -0.5 | | -0.5 | | -0.5 | | -1.53 | | -1.25 | | -1.22 | | -1.15 | | -1.1 | | -1.09 | | -1.04 | | -1.04 | | -1.02 | | -1 | | -1 | | -0.99 | | -0.98 | | -0.93 | | -0.9 | | -0.86 | | -0.85 | | -0.83 | | -0.82 | | -0.8 | | -0.79 | | -0.78 | | -0.76 | | -0.76 | | -0.75 | | -0.73 | | -0.73 | | -0.73 | | -0.72 | | -0.72 | | -0.72 | | -0.72 | | -0.71 | | -0.71 | | -0.71 | | -0.7 | | -0.7 | | -0.69 | | -0.69 | | -0.69 | | -0.68 | | -0.68 | | -0.66 | | -0.66 | | -0.66 | | -0.65 | | -0.65 | | -0.65 | | -0.64 | | -0.64 | | -0.64 | | -0.64 | | -0.64 | | -0.63 | | -0.63 | | -0.62 | | -0.62 | | -0.62 | | -0.62 | | -0.61 | | -0.61 | | -0.61 | | -0.61 | | -0.61 | | -0.61 | | -0.6 | | -0.6 | | -0.6 | | -0.6 | | -0.6 | | -0.59 | | -0.59 | | -0.59 | | -0.59 | | -0.58 | | -0.58 | | -0.58 | | -0.58 | | -0.58 | | -0.58 | | -0.57 | | -0.57 | | -0.57 | | -0.57 | | -0.56 | | -0.56 | | -0.56 | | -0.56 | | -0.56 | | -0.56 | | -0.56 | | -0.56 | | -0.55 | | -0.55 | | -0.55 | | -0.55 | | -0.55 | | -0.55 | | -0.55 | | -0.54 | | -0.54 | | -0.54 | | -0.54 | | -0.54 | | -0.54 | | -0.54 | | -0.54 | | -0.54 | | -0.54 | | -0.54 | | -0.53 | | -0.53 | | -0.52 | | -0.52 | | -0.52 | | -0.52 | | -0.52 | | -0.52 | | -0.52 | | -0.52 | | -0.52 | | -0.52 | | -0.52 | | -0.52 | | -0.51 | | -0.51 | | -0.51 | | -0.51 | | -0.51 | | -0.51 | | -0.51 | | -0.51 | | -0.51 | | -0.51 | | -0.5 | | -0.5 | | -0.5 | | -0.73 | | -0.72 | | -0.6 | | -0.55 | | -0.55 | | -0.54 | | -0.52 | | -0.5 | | -0.5 | | -0.5 | | -1.28 | | -1.19 | | -1.15 | | -1.12 | | -1.05 | | -1.04 | | -0.99 | | -0.94 | | -0.9 | | -0.86 | | -0.86 | | -0.86 | | -0.85 | | -0.81 | | -0.81 | | -0.81 | | -0.8 | | -0.79 | | -0.78 | | -0.78 | | -0.78 | | -0.76 | | -0.76 | | -0.76 | | -0.76 | | -0.75 | | -0.74 | | -0.74 | | -0.73 | | -0.72 | | -0.72 | | -0.71 | | -0.71 | | -0.71 | | -0.7 | | -0.7 | | -0.7 | | -0.69 | | -0.68 | | -0.68 | | -0.67 | | -0.67 | | -0.67 | | -0.67 | | -0.67 | | -0.67 | | -0.67 | | -0.66 | | -0.66 | | -0.66 | | -0.66 | | -0.66 | | -0.66 | | -0.66 | | -0.66 | | -0.66 | | -0.66 | | -0.66 | | -0.64 | | -0.64 | | -0.64 | | -0.64 | | -0.64 | | -0.63 | | -0.62 | | -0.62 | | -0.62 | | -0.61 | | -0.61 | | -0.61 | | -0.61 | | -0.61 | | -0.6 | | -0.6 | | -0.6 | | -0.6 | | -0.59 | | -0.59 | | -0.59 | | -0.58 | | -0.58 | | -0.58 | | -0.58 | | -0.58 | | -0.58 | | -0.58 | | -0.58 | | -0.57 | | -0.57 | | -0.57 | | -0.57 | | -0.57 | | -0.56 | | -0.56 | | -0.56 | | -0.56 | | -0.56 | | -0.56 | | -0.56 | | -0.56 | | -0.56 | | -0.56 | | -0.55 | | -0.55 | | -0.55 | | -0.55 | | -0.55 | | -0.55 | | -0.55 | | -0.54 | | -0.54 | | -0.54 | | -0.54 | | -0.54 | | -0.54 | | -0.54 | | -0.54 | | -0.54 | | -0.54 | | -0.53 | | -0.53 | | -0.53 | | -0.53 | | -0.52 | | -0.52 | | -0.52 | | -0.52 | | -0.52 | | -0.51 | | -0.51 | | -0.51 | | -0.51 | | -0.51 | | -0.51 | | -0.51 | | -0.5 | | -0.5 | | -0.5 | |
